# Supplementary material
Source: Springer Nature journal article supplement (https://www.springermedizin.de/resource/supplementary/12967_2014_1866_MOESM1_ESM.pdf/9575008)
Supplement: MOESM1 [file 9575008]

Table S1. The differentially expressed miRNAs in LUAD and normal samples

| miRNA          | logFC    | logCPM   | LR       | P-value  | FDR      |
|----------------|----------|----------|----------|----------|----------|
| hsa-let-7a-1   | -1.17679 | 13.33789 | 148.6665 | 3.39E-34 | 5.39E-33 |
| hsa-let-7a-2   | -1.17534 | 14.34003 | 149.2303 | 2.55E-34 | 4.31E-33 |
| hsa-let-7a-3   | -1.17449 | 13.34533 | 148.3797 | 3.92E-34 | 5.88E-33 |
| hsa-let-7c     | -1.57564 | 10.69916 | 122.141  | 2.15E-28 | 2.42E-27 |
| hsa-let-7f-2   | -1.4696  | 13.87424 | 188.7286 | 6.02E-43 | 1.36E-41 |
| hsa-mir-1-2    | -2.59898 | 4.065747 | 133.8718 | 5.83E-31 | 7.87E-30 |
| hsa-mir-101-1  | -1.27797 | 13.66537 | 135.6156 | 2.42E-31 | 3.44E-30 |
| hsa-mir-101-2  | -2.13637 | 5.814561 | 321.1529 | 8.12E-72 | 2.19E-69 |
| hsa-mir-105-1  | 6.383098 | 4.822748 | 30.87248 | 2.76E-08 | 8.00E-08 |
| hsa-mir-105-2  | 7.427085 | 4.822094 | 36.99548 | 1.18E-09 | 4.15E-09 |
| hsa-mir-1247   | -1.66999 | 4.743856 | 39.15314 | 3.92E-10 | 1.43E-09 |
| hsa-mir-126    | -1.50625 | 11.34904 | 161.1408 | 6.37E-37 | 1.15E-35 |
| hsa-mir-1266   | 1.18216  | 4.261688 | 30.15171 | 4.00E-08 | 1.14E-07 |
| hsa-mir-1269   | 8.979179 | 7.09475  | 77.94129 | 1.06E-18 | 7.54E-18 |
| hsa-mir-129-1  | 1.397652 | 2.305911 | 13.50877 | 0.000237 | 0.000445 |
| hsa-mir-129-2  | 1.475944 | 2.46905  | 15.1715  | 9.82E-05 | 0.000198 |
| hsa-mir-1301   | 1.559138 | 3.930829 | 65.23428 | 6.65E-16 | 3.74E-15 |
| hsa-mir-1306   | 1.265995 | 3.350879 | 43.3168  | 4.66E-11 | 1.82E-10 |
| hsa-mir-1307   | 1.46029  | 10.43267 | 108.2041 | 2.42E-25 | 2.42E-24 |
| hsa-mir-130b   | 2.013942 | 5.11708  | 92.51654 | 6.68E-22 | 5.46E-21 |
| hsa-mir-133a-1 | -2.34487 | 3.150875 | 107.4977 | 3.46E-25 | 3.34E-24 |
| hsa-mir-134    | 1.386782 | 7.816498 | 24.38979 | 7.87E-07 | 2.00E-06 |
| hsa-mir-135b   | 2.256789 | 5.941297 | 70.39904 | 4.84E-17 | 2.84E-16 |
| hsa-mir-140    | -1.24746 | 10.08169 | 179.3729 | 6.64E-41 | 1.38E-39 |
| hsa-mir-141    | 1.427523 | 10.57744 | 70.50162 | 4.60E-17 | 2.76E-16 |
| hsa-mir-143    | -1.94447 | 17.04544 | 299.298  | 4.68E-67 | 5.38E-65 |
| hsa-mir-144    | -3.39005 | 7.817757 | 239.4497 | 5.18E-54 | 2.00E-52 |
| hsa-mir-149    | 1.12099  | 5.195308 | 15.70989 | 7.38E-05 | 0.000151 |
| hsa-mir-153-2  | 3.340968 | 4.170767 | 86.81247 | 1.19E-20 | 8.95E-20 |
| hsa-mir-154    | 1.078276 | 2.638742 | 13.62325 | 0.000223 | 0.000422 |
| hsa-mir-182    | 1.886096 | 14.46114 | 105.3396 | 1.03E-24 | 9.26E-24 |
| hsa-mir-183    | 2.346508 | 13.47908 | 115.4896 | 6.15E-27 | 6.64E-26 |
| hsa-mir-184    | -3.55362 | 3.533951 | 132.5622 | 1.13E-30 | 1.45E-29 |
| hsa-mir-187    | 2.235523 | 4.892498 | 31.58536 | 1.91E-08 | 5.73E-08 |
| hsa-mir-192    | 2.851677 | 11.19809 | 36.87095 | 1.26E-09 | 4.31E-09 |
| hsa-mir-193b   | 2.128594 | 6.168042 | 77.86821 | 1.10E-18 | 7.63E-18 |
| hsa-mir-194-1  | 2.715447 | 8.867929 | 35.02366 | 3.26E-09 | 1.07E-08 |
| hsa-mir-194-2  | 2.690178 | 8.993801 | 34.50296 | 4.26E-09 | 1.37E-08 |
| hsa-mir-195    | -2.06901 | 5.739235 | 298.812  | 5.98E-67 | 5.38E-65 |
| hsa-mir-196a-1 | 6.09268  | 6.847917 | 75.35353 | 3.94E-18 | 2.59E-17 |
| hsa-mir-196a-2 | 5.159921 | 2.438671 | 45.43333 | 1.58E-11 | 6.66E-11 |

|               |          |          |          |          |          |
|---------------|----------|----------|----------|----------|----------|
| hsa-mir-196b  | 3.069759 | 6.783817 | 43.63745 | 3.95E-11 | 1.57E-10 |
| hsa-mir-200a  | 2.025154 | 9.799207 | 92.15972 | 8.00E-22 | 6.35E-21 |
| hsa-mir-200b  | 1.048135 | 9.544366 | 30.46155 | 3.41E-08 | 9.78E-08 |
| hsa-mir-204   | -1.04731 | 2.623073 | 11.75746 | 0.000606 | 0.001069 |
| hsa-mir-205   | 2.954848 | 9.007248 | 31.27737 | 2.24E-08 | 6.64E-08 |
| hsa-mir-21    | 1.668484 | 18.40611 | 169.6405 | 8.86E-39 | 1.71E-37 |
| hsa-mir-210   | 4.536205 | 9.981875 | 235.0115 | 4.81E-53 | 1.62E-51 |
| hsa-mir-215   | 3.303523 | 5.506995 | 36.96169 | 1.20E-09 | 4.17E-09 |
| hsa-mir-217   | 1.28307  | 5.3757   | 17.20751 | 3.35E-05 | 7.24E-05 |
| hsa-mir-218-2 | -2.1717  | 5.94516  | 282.303  | 2.36E-63 | 1.60E-61 |
| hsa-mir-223   | -1.5356  | 8.391868 | 77.42393 | 1.38E-18 | 9.31E-18 |
| hsa-mir-224   | 1.599938 | 5.823381 | 28.68716 | 8.51E-08 | 2.34E-07 |
| hsa-mir-296   | 1.084033 | 2.647393 | 17.8237  | 2.42E-05 | 5.28E-05 |
| hsa-mir-30a   | -2.46106 | 14.54987 | 233.2685 | 1.15E-52 | 3.46E-51 |
| hsa-mir-30c-2 | -1.35665 | 8.912388 | 203.4176 | 3.75E-46 | 9.21E-45 |
| hsa-mir-31    | 3.380597 | 4.229678 | 40.77186 | 1.71E-10 | 6.42E-10 |
| hsa-mir-323   | 2.547688 | 2.52574  | 28.18781 | 1.10E-07 | 3.00E-07 |
| hsa-mir-323b  | 4.15596  | 3.022184 | 53.79887 | 2.22E-13 | 1.07E-12 |
| hsa-mir-331   | 1.410294 | 5.494887 | 105.4691 | 9.64E-25 | 8.97E-24 |
| hsa-mir-338   | -1.21074 | 9.663072 | 28.73095 | 8.32E-08 | 2.31E-07 |
| hsa-mir-33a   | 1.036796 | 4.395712 | 32.88705 | 9.77E-09 | 3.03E-08 |
| hsa-mir-345   | 2.041154 | 4.208743 | 90.27147 | 2.08E-21 | 1.60E-20 |
| hsa-mir-34b   | -1.54076 | 4.333465 | 18.0358  | 2.17E-05 | 4.80E-05 |
| hsa-mir-34c   | -1.99601 | 6.731809 | 33.32002 | 7.82E-09 | 2.48E-08 |
| hsa-mir-3607  | 2.214981 | 5.289925 | 126.5558 | 2.32E-29 | 2.85E-28 |
| hsa-mir-370   | 1.181339 | 3.271463 | 14.24898 | 0.00016  | 0.000311 |
| hsa-mir-371   | 4.46682  | 3.243685 | 7.820083 | 0.005167 | 0.007972 |
| hsa-mir-372   | 4.767824 | 6.167704 | 15.13525 | 0.0001   | 0.0002   |
| hsa-mir-373   | 4.210204 | 1.868783 | 9.930946 | 0.001625 | 0.002683 |
| hsa-mir-374b  | -1.36069 | 5.928331 | 230.5466 | 4.53E-52 | 1.22E-50 |
| hsa-mir-375   | 2.075957 | 15.18177 | 36.50564 | 1.52E-09 | 5.14E-09 |
| hsa-mir-378   | -1.24228 | 8.408202 | 32.88942 | 9.76E-09 | 3.03E-08 |
| hsa-mir-381   | 1.032088 | 5.596999 | 14.25305 | 0.00016  | 0.000311 |
| hsa-mir-382   | 1.33107  | 4.065253 | 23.36398 | 1.34E-06 | 3.35E-06 |
| hsa-mir-409   | 1.929186 | 4.577288 | 39.87918 | 2.70E-10 | 9.99E-10 |
| hsa-mir-410   | 1.600596 | 4.27548  | 23.27381 | 1.40E-06 | 3.48E-06 |
| hsa-mir-412   | 1.352283 | 2.173683 | 12.62103 | 0.000381 | 0.000696 |
| hsa-mir-424   | 1.189727 | 6.395309 | 36.40273 | 1.60E-09 | 5.35E-09 |
| hsa-mir-429   | 1.049187 | 6.926867 | 27.54045 | 1.54E-07 | 4.15E-07 |
| hsa-mir-431   | 1.98523  | 4.087955 | 25.58623 | 4.23E-07 | 1.11E-06 |
| hsa-mir-432   | 1.074869 | 3.295471 | 10.11221 | 0.001473 | 0.00247  |
| hsa-mir-451   | -3.39584 | 9.901368 | 247.7446 | 8.06E-56 | 3.63E-54 |
| hsa-mir-455   | 1.20721  | 7.384144 | 64.8525  | 8.07E-16 | 4.45E-15 |

|                |          |          |          |          |          |
|----------------|----------|----------|----------|----------|----------|
| hsa-mir-483    | 1.608098 | 3.130996 | 9.824578 | 0.001722 | 0.002818 |
| hsa-mir-485    | 1.712744 | 2.869282 | 20.10235 | 7.34E-06 | 1.72E-05 |
| hsa-mir-486    | -3.27573 | 8.53928  | 248.0266 | 6.99E-56 | 3.63E-54 |
| hsa-mir-487b   | 1.336885 | 2.747046 | 16.39786 | 5.13E-05 | 0.000107 |
| hsa-mir-493    | 1.291799 | 3.751886 | 20.94234 | 4.73E-06 | 1.12E-05 |
| hsa-mir-509-2  | 1.173383 | 2.639822 | 5.065098 | 0.024412 | 0.034691 |
| hsa-mir-519a-1 | 2.278719 | 2.984921 | 7.959426 | 0.004784 | 0.007466 |
| hsa-mir-539    | 2.768769 | 2.756358 | 44.82799 | 2.15E-11 | 8.67E-11 |
| hsa-mir-541    | 2.962374 | 0.512543 | 22.40536 | 2.21E-06 | 5.32E-06 |
| hsa-mir-552    | 1.619614 | 4.123391 | 6.594519 | 0.010229 | 0.015344 |
| hsa-mir-577    | 3.543105 | 2.891811 | 54.80158 | 1.33E-13 | 6.55E-13 |
| hsa-mir-625    | 1.286054 | 8.088431 | 56.358   | 6.04E-14 | 3.02E-13 |
| hsa-mir-675    | 4.040679 | 6.028141 | 45.71681 | 1.37E-11 | 5.86E-11 |
| hsa-mir-7-1    | 1.479855 | 4.383523 | 84.26684 | 4.32E-20 | 3.15E-19 |
| hsa-mir-708    | 2.22976  | 6.731132 | 111.2344 | 5.26E-26 | 5.46E-25 |
| hsa-mir-766    | 1.486796 | 3.356044 | 74.4603  | 6.19E-18 | 3.88E-17 |
| hsa-mir-767    | 6.947759 | 4.674975 | 34.74897 | 3.75E-09 | 1.22E-08 |
| hsa-mir-889    | 1.580589 | 4.319785 | 22.7041  | 1.89E-06 | 4.60E-06 |
| hsa-mir-891a   | 2.031389 | 3.631831 | 16.23902 | 5.58E-05 | 0.000115 |
| hsa-mir-9-1    | 4.63755  | 10.6544  | 63.68097 | 1.46E-15 | 7.90E-15 |
| hsa-mir-9-2    | 4.644384 | 10.65196 | 63.39866 | 1.69E-15 | 8.94E-15 |
| hsa-mir-92b    | 1.359489 | 7.712856 | 74.4866  | 6.11E-18 | 3.88E-17 |
| hsa-mir-935    | 1.76685  | 1.568214 | 16.82096 | 4.11E-05 | 8.80E-05 |
| hsa-mir-937    | 2.959685 | 2.902378 | 66.51703 | 3.47E-16 | 1.99E-15 |
| hsa-mir-944    | 1.051065 | 2.2746   | 8.094257 | 0.004441 | 0.006971 |
| hsa-mir-96     | 2.013587 | 4.618347 | 94.50254 | 2.45E-22 | 2.07E-21 |
| hsa-mir-99a    | -1.22028 | 8.368973 | 73.40783 | 1.05E-17 | 6.47E-17 |

Table S2. Clinical covariates for the TCGA LUAD cohort by miRNA signature group

| Covariates                     |        | Total      | High-risk group | Low-risk group | P-value |
|--------------------------------|--------|------------|-----------------|----------------|---------|
| Age, years, no (%)             | <=65   | 174 (46.8) | 83 (46.4)       | 91 (47.2)      | 0.9625  |
|                                | >65    | 198 (53.2) | 96 (53.6)       | 102 (52.8)     |         |
| Gender, no (%)                 | Male   | 176 (47.3) | 87 (48.6)       | 89 (46.1)      | 0.6308  |
|                                | Female | 196 (52.7) | 92 (51.4)       | 104 (53.9)     |         |
| Disease Stage, no (%)          | I      | 199 (53.5) | 83 (46.4)       | 116 (60.1)     | 0.0252  |
|                                | II     | 89 (23.9)  | 44 (24.6)       | 45 (23.3)      |         |
|                                | III    | 66 (17.7)  | 40 (22.3)       | 26 (13.5)      |         |
|                                | IV     | 17 (4.6)   | 11 (6.1)        | 6 (3.1)        |         |
| Lymph Node Involvement, no (%) | N0     | 231 (62.1) | 95 (53.1)       | 136 (70.5)     | 0.0085  |
|                                | N1     | 72 (19.4)  | 40 (22.3)       | 32 (16.6)      |         |
|                                | N2     | 58 (15.6)  | 36 (20.1)       | 22 (11.4)      |         |
|                                | N3     | 1 (0.3)    | 1 (0.6)         | 0 (0.0)        |         |

|                          |           |            |            |            |        |
|--------------------------|-----------|------------|------------|------------|--------|
| M stage, no (%)          | M0        | 266 (71.5) | 134 (74.9) | 132 (68.4) | 0.1532 |
|                          | M1        | 16 (4.3)   | 11 (6.1)   | 5 (2.6)    |        |
| T stage, no (%)          | T1        | 112 (30.1) | 42 (23.5)  | 60 (31.1)  | 0.6659 |
|                          | T2        | 211 (56.7) | 102 (57.0) | 109 (56.5) |        |
|                          | T3        | 31 (8.3)   | 15 (8.4)   | 16 (8.3)   |        |
|                          | T4        | 16 (4.3)   | 8 (4.5)    | 8 (4.1)    |        |
| Smoking status<br>no (%) | Nonsmoker | 143 (38.4) | 66 (36.9)  | 77 (39.9)  | 0.6780 |
|                          | Smoker    | 217 (58.3) | 105 (58.7) | 112 (58.0) |        |

\*Nonsmoker is who did not smoke in his/her lifetime, or reformed smoking more than 15 years.

Table S3. Clinical covariates for the TCGA LUAD cohort by smoking status

| Covariates                        |        | Total      | Nonsmoker  | Smoker     | P-value |
|-----------------------------------|--------|------------|------------|------------|---------|
| Age, years, no (%)                | <=65   | 174 (46.8) | 44 (30.8)  | 126 (58.1) | 0.000   |
|                                   | >65    | 198 (53.2) | 99 (69.2)  | 91 (41.9)  |         |
| Gender, no (%)                    | Male   | 176 (47.3) | 64 (44.8)  | 107 (49.3) | 0.3972  |
|                                   | Female | 196 (52.7) | 79 (55.2)  | 110 (50.7) |         |
| Disease Stage, no (%)             | I      | 199 (53.5) | 79 (55.2)  | 116 (53.5) | 0.9657  |
|                                   | II     | 89 (23.9)  | 33 (23.1)  | 52 (24.0)  |         |
|                                   | III    | 66 (17.7)  | 23 (16.1)  | 39 (18.0)  |         |
|                                   | IV     | 17 (4.6)   | 7 (4.9)    | 10 (4.6)   |         |
| Lymph Node Involvement,<br>no (%) | N0     | 231 (62.1) | 91 (6.36)  | 137 (63.1) | 0.7485  |
|                                   | N1     | 72 (19.4)  | 23 (16.1)  | 43 (19.8)  |         |
|                                   | N2     | 58 (15.6)  | 22 (15.4)  | 33 (15.2)  |         |
|                                   | N3     | 1 (0.3)    | 0 (0.0)    | 1 (0.5)    |         |
| M stage, no (%)                   | M0     | 266 (71.5) | 101 (70.6) | 154 (71.0) | 0.8671  |
|                                   | M1     | 16 (4.3)   | 6 (4.2)    | 10 (4.6)   |         |
| T stage, no (%)                   | T1     | 112 (30.1) | 42 (29.4)  | 67 (30.9)  | 0.5311  |
|                                   | T2     | 211 (56.7) | 84 (58.7)  | 120 (55.3) |         |
|                                   | T3     | 31 (8.3)   | 12 (8.)    | 19 (8.8)   |         |
|                                   | T4     | 16 (4.3)   | 3 (2.1)    | 11 (5.1)   |         |

\*Nonsmoker is who did not smoke in his/her lifetime, or reformed smoking more than 15 years.

Table S4. Multivariate Cox proportional hazards analysis

| Covariates        | Coef  | HR    | Lower 95%CI of HR | Upper 95%CI of HR | P-value  |
|-------------------|-------|-------|-------------------|-------------------|----------|
| age               | 0.020 | 1.020 | 0.998             | 1.043             | 0.082    |
| T stage           | 0.386 | 1.470 | 0.835             | 2.588             | 0.182    |
| N stage           | 0.958 | 2.607 | 1.730             | 3.929             | 4.66e-06 |
| M stage           | 0.543 | 1.723 | 0.838             | 3.538             | 0.139    |
| 8-miRNA signature | 0.401 | 1.493 | 1.251             | 1.782             | 8.83e-06 |

Table S5. The over-representation analysis for target genes

| Category | Subcategory                                     | Subcategory         |          | P-value<br>(FDR) | Enrichment |          |
|----------|-------------------------------------------------|---------------------|----------|------------------|------------|----------|
|          |                                                 | alternative<br>name | Expected |                  |            | Observed |
| KEGG     | Olfactory transduction                          | 4740                | 152.975  | 24               | 2.80E-52   | down     |
| KEGG     | Axon guidance                                   | 4360                | 50.8601  | 87               | 7.27E-09   | up       |
| KEGG     | Systemic lupus erythematosus                    | 5322                | 55.5913  | 21               | 7.81E-09   | down     |
| KEGG     | <b>Focal adhesion</b>                           | 4510                | 79.2472  | 118              | 7.43E-07   | up       |
| KEGG     | <b>Pathways in cancer</b>                       | 5200                | 129.319  | 177              | 1.14E-06   | up       |
| KEGG     | <b>Wnt signaling pathway</b>                    | 4310                | 59.534   | 92               | 1.76E-06   | up       |
| KEGG     | Ribosome                                        | 3010                | 34.6953  | 13               | 1.03E-05   | down     |
| KEGG     | Parkinson's disease                             | 5012                | 52.0429  | 26               | 1.93E-05   | down     |
| KEGG     | Oxidative phosphorylation                       | 190                 | 52.8315  | 27               | 2.58E-05   | down     |
| KEGG     | Insulin signaling pathway                       | 4910                | 54.0142  | 81               | 3.86E-05   | up       |
| KEGG     | Neurotrophin signaling pathway                  | 4722                | 49.6773  | 75               | 5.94E-05   | up       |
| KEGG     | <b>Adherens junction</b>                        | 4520                | 29.5698  | 48               | 0.000222   | up       |
| KEGG     | Regulation of actin cytoskeleton                | 4810                | 85.1611  | 115              | 0.000301   | up       |
| KEGG     | Proteasome                                      | 3050                | 18.9247  | 6                | 0.000574   | down     |
| KEGG     | Melanogenesis                                   | 4916                | 40.215   | 60               | 0.000687   | up       |
| KEGG     | Adipocytokine signaling pathway                 | 4920                | 26.4157  | 42               | 0.001007   | up       |
| KEGG     | Chronic myeloid leukemia                        | 5220                | 28.7813  | 45               | 0.001007   | up       |
| KEGG     | Glioma                                          | 5214                | 25.6272  | 41               | 0.001007   | up       |
| KEGG     | Prostate cancer                                 | 5215                | 35.0895  | 53               | 0.001007   | up       |
| KEGG     | T cell receptor signaling pathway               | 4660                | 42.5806  | 62               | 0.001056   | up       |
| KEGG     | <b>ErbB signaling pathway</b>                   | 4012                | 34.301   | 51               | 0.002005   | up       |
| KEGG     | Endometrial cancer                              | 5213                | 20.5018  | 33               | 0.003361   | up       |
| KEGG     | <b>Non-small cell lung cancer</b>               | 5223                | 21.2903  | 34               | 0.003361   | up       |
| KEGG     | <b>Apoptosis</b>                                | 4210                | 34.6953  | 50               | 0.005584   | up       |
| KEGG     | Arachidonic acid metabolism                     | 590                 | 22.8673  | 11               | 0.005584   | down     |
| KEGG     | Calcium signaling pathway                       | 4020                | 70.1791  | 91               | 0.006491   | up       |
| KEGG     | Endocytosis                                     | 4144                | 80.8242  | 103              | 0.006491   | up       |
| KEGG     | Huntington's disease                            | 5016                | 72.5447  | 52               | 0.006491   | down     |
| KEGG     | Drug metabolism - cytochrome<br>P450            | 982                 | 28.7813  | 16               | 0.007801   | down     |
| KEGG     | Gap junction                                    | 4540                | 35.4838  | 50               | 0.008649   | up       |
| KEGG     | Melanoma                                        | 5218                | 27.9928  | 41               | 0.008649   | up       |
| KEGG     | Spliceosome                                     | 3040                | 50.4659  | 34               | 0.009061   | down     |
| KEGG     | <b>Small cell lung cancer</b>                   | 5222                | 33.1182  | 47               | 0.009182   | up       |
| KEGG     | Basal cell carcinoma                            | 5217                | 21.6846  | 33               | 0.009326   | up       |
| KEGG     | Metabolism of xenobiotics by<br>cytochrome P450 | 980                 | 27.9928  | 16               | 0.011024   | down     |
| KEGG     | Cell adhesion molecules (CAMs)                  | 4514                | 53.2257  | 70               | 0.011676   | up       |
| KEGG     | Leukocyte transendothelial<br>migration         | 4670                | 46.5232  | 62               | 0.013309   | up       |

|               |                                                            |            |         |      |          |      |
|---------------|------------------------------------------------------------|------------|---------|------|----------|------|
| KEGG          | SNARE interactions in vesicular transport                  | 4130       | 14.1935 | 23   | 0.01363  | up   |
| KEGG          | <b>p53 signaling pathway</b>                               | 4115       | 27.2043 | 39   | 0.014989 | up   |
| KEGG          | <b>MAPK signaling pathway</b>                              | 4010       | 105.269 | 127  | 0.017525 | up   |
| KEGG          | Gastric acid secretion                                     | 4971       | 29.1756 | 41   | 0.018487 | up   |
| KEGG          | Thyroid cancer                                             | 5216       | 11.4337 | 19   | 0.019022 | up   |
| KEGG          | Type II diabetes mellitus                                  | 4930       | 18.5304 | 28   | 0.019022 | up   |
| KEGG          | Lysosome                                                   | 4142       | 47.706  | 62   | 0.023843 | up   |
| KEGG          | Amyotrophic lateral sclerosis (ALS)                        | 5014       | 20.896  | 30   | 0.035011 | up   |
| KEGG          | Chemokine signaling pathway                                | 4062       | 74.516  | 91   | 0.035011 | up   |
| KEGG          | Fatty acid elongation in mitochondria                      | 62         | 3.15412 | 7    | 0.035011 | up   |
| KEGG          | Long-term potentiation                                     | 4720       | 27.5985 | 38   | 0.035011 | up   |
| KEGG          | Ubiquitin mediated proteolysis                             | 4120       | 54.8028 | 69   | 0.035662 | up   |
| KEGG          | Colorectal cancer                                          | 5210       | 24.4444 | 34   | 0.039649 | up   |
| KEGG          | ECM-receptor interaction                                   | 4512       | 33.1182 | 44   | 0.041892 | up   |
| KEGG          | Glycosphingolipid biosynthesis - lacto and neolacto series | 601        | 10.6451 | 17   | 0.044412 | up   |
| KEGG          | Phosphatidylinositol signaling system                      | 4070       | 30.7526 | 41   | 0.047252 | up   |
| KEGG          | Autoimmune thyroid disease                                 | 5320       | 21.2903 | 13   | 0.048008 | down |
| KEGG          | VEGF signaling pathway                                     | 4370       | 29.9641 | 40   | 0.048008 | up   |
| Gene Ontology | olfactory receptor activity                                | GO:0004984 | 160.616 | 5    | 4.24E-76 | down |
| Gene Ontology | sensory perception of chemical stimulus                    | GO:0007606 | 183.232 | 19   | 3.67E-69 | down |
| Gene Ontology | sensory perception of smell                                | GO:0007608 | 165.599 | 13   | 1.57E-67 | down |
| Gene Ontology | cellular process                                           | GO:0009987 | 4455.08 | 4935 | 2.83E-52 | up   |
| Gene Ontology | binding                                                    | GO:0005488 | 4747.18 | 5170 | 1.94E-43 | up   |
| Gene Ontology | biological regulation                                      | GO:0065007 | 2672.2  | 3112 | 8.76E-41 | up   |
| Gene Ontology | G-protein coupled receptor activity                        | GO:0004930 | 327.748 | 150  | 1.05E-38 | down |
| Gene Ontology | regulation of biological process                           | GO:0050789 | 2520.79 | 2933 | 1.31E-36 | up   |
| Gene Ontology | regulation of cellular process                             | GO:0050794 | 2395.82 | 2795 | 4.49E-35 | up   |
| Gene Ontology | protein binding                                            | GO:0005515 | 3122.62 | 3531 | 6.20E-34 | up   |
| Gene Ontology | signaling                                                  | GO:0023052 | 1368.88 | 1663 | 1.17E-26 | up   |
| Gene Ontology | anatomical structure development                           | GO:0048856 | 1093.64 | 1350 | 5.24E-24 | up   |
| Gene Ontology | sensory perception                                         | GO:0007600 | 318.165 | 178  | 6.79E-24 | down |
| Gene Ontology | developmental process                                      | GO:0032502 | 1311.76 | 1582 | 2.92E-23 | up   |
| Gene Ontology | system development                                         | GO:0048731 | 986.312 | 1228 | 2.92E-23 | up   |
| Gene Ontology | intracellular                                              | GO:0005622 | 4342.76 | 4665 | 8.87E-23 | up   |
| Gene Ontology | signaling pathway                                          | GO:0023033 | 976.345 | 1210 | 6.14E-22 | up   |
| Gene Ontology | multicellular organismal development                       | GO:0007275 | 1195.61 | 1447 | 1.25E-21 | up   |
| Gene Ontology | localization                                               | GO:0051179 | 1288.76 | 1542 | 1.00E-20 | up   |

|               |                                                                                     |            |         |      |          |      |
|---------------|-------------------------------------------------------------------------------------|------------|---------|------|----------|------|
| Gene Ontology | cellular macromolecule metabolic process                                            | GO:0044260 | 2184.61 | 2476 | 1.83E-19 | up   |
| Gene Ontology | nervous system development                                                          | GO:0007399 | 450.031 | 606  | 2.99E-19 | up   |
| Gene Ontology | signal transmission                                                                 | GO:0023060 | 985.545 | 1205 | 3.07E-19 | up   |
| Gene Ontology | signaling process                                                                   | GO:0023046 | 987.845 | 1207 | 3.56E-19 | up   |
| Gene Ontology | cellular metabolic process                                                          | GO:0044237 | 2848.54 | 3153 | 3.56E-19 | up   |
| Gene Ontology | membrane-bounded organelle                                                          | GO:0043227 | 3213.47 | 3519 | 6.66E-19 | up   |
| Gene Ontology | intracellular membrane-bounded organelle                                            | GO:0043231 | 3210.78 | 3516 | 7.01E-19 | up   |
| Gene Ontology | intracellular part                                                                  | GO:0044424 | 4207.45 | 4503 | 8.38E-19 | up   |
| Gene Ontology | plasma membrane part                                                                | GO:0044459 | 775.48  | 970  | 1.46E-18 | up   |
| Gene Ontology | regulation of metabolic process                                                     | GO:0019222 | 1514.54 | 1764 | 5.54E-18 | up   |
| Gene Ontology | regulation of cellular metabolic process                                            | GO:0031323 | 1444.39 | 1688 | 9.61E-18 | up   |
| Gene Ontology | primary metabolic process                                                           | GO:0044238 | 2924.44 | 3216 | 1.58E-17 | up   |
| Gene Ontology | cytoplasm                                                                           | GO:0005737 | 2942.45 | 3231 | 3.82E-17 | up   |
| Gene Ontology | cognition                                                                           | GO:0050890 | 355.732 | 230  | 4.47E-17 | down |
| Gene Ontology | intracellular signaling pathway                                                     | GO:0023034 | 583.43  | 747  | 7.03E-17 | up   |
| Gene Ontology | regulation of primary metabolic process                                             | GO:0080090 | 1374.24 | 1607 | 7.78E-17 | up   |
| Gene Ontology | organ development                                                                   | GO:0048513 | 740.98  | 922  | 8.85E-17 | up   |
| Gene Ontology | macromolecule metabolic process                                                     | GO:0043170 | 2405.02 | 2680 | 1.01E-16 | up   |
| Gene Ontology | cellular developmental process                                                      | GO:0048869 | 737.53  | 916  | 2.17E-16 | up   |
| Gene Ontology | cell communication                                                                  | GO:0007154 | 646.68  | 814  | 3.65E-16 | up   |
| Gene Ontology | regulation of biosynthetic process                                                  | GO:0009889 | 1176.83 | 1390 | 6.50E-16 | up   |
| Gene Ontology | signal transduction                                                                 | GO:0007165 | 855.596 | 1042 | 9.03E-16 | up   |
| Gene Ontology | transmembrane receptor activity                                                     | GO:0004888 | 488.748 | 348  | 9.42E-16 | down |
| Gene Ontology | regulation of cellular biosynthetic process                                         | GO:0031326 | 1168.39 | 1379 | 1.21E-15 | up   |
| Gene Ontology | regulation of macromolecule metabolic process                                       | GO:0060255 | 1307.54 | 1527 | 1.35E-15 | up   |
| Gene Ontology | intracellular organelle                                                             | GO:0043229 | 3582.62 | 3858 | 1.63E-15 | up   |
| Gene Ontology | organelle                                                                           | GO:0043226 | 3587.98 | 3862 | 2.28E-15 | up   |
| Gene Ontology | cell differentiation                                                                | GO:0030154 | 703.03  | 871  | 3.36E-15 | up   |
| Gene Ontology | anatomical structure morphogenesis                                                  | GO:0009653 | 535.131 | 683  | 5.23E-15 | up   |
| Gene Ontology | regulation of nucleobase, nucleoside, nucleotide and nucleic acid metabolic process | GO:0019219 | 1165.33 | 1370 | 7.62E-15 | up   |
| Gene Ontology | biological_process                                                                  | GO:0008150 | 5488.54 | 5700 | 9.45E-15 | up   |
| Gene Ontology | cellular biosynthetic process                                                       | GO:0044249 | 1658.29 | 1890 | 9.85E-15 | up   |
| Gene Ontology | molecular_function                                                                  | GO:0003674 | 5927.07 | 6106 | 1.07E-14 | up   |
| Gene Ontology | regulation of nitrogen compound metabolic process                                   | GO:0051171 | 1175.29 | 1379 | 1.23E-14 | up   |

|               |                                                                                              |            |         |      |          |    |
|---------------|----------------------------------------------------------------------------------------------|------------|---------|------|----------|----|
| Gene Ontology | regulation of macromolecule biosynthetic process                                             | GO:0010556 | 1112.04 | 1311 | 1.37E-14 | up |
| Gene Ontology | positive regulation of biological process                                                    | GO:0048518 | 858.662 | 1036 | 2.52E-14 | up |
| Gene Ontology | biosynthetic process                                                                         | GO:0009058 | 1700.46 | 1929 | 3.99E-14 | up |
| Gene Ontology | metabolic process                                                                            | GO:0008152 | 3212.7  | 3474 | 5.21E-14 | up |
| Gene Ontology | intracellular signal transduction                                                            | GO:0035556 | 461.914 | 594  | 9.66E-14 | up |
| Gene Ontology | positive regulation of cellular process                                                      | GO:0048522 | 781.23  | 947  | 1.40E-13 | up |
| Gene Ontology | regulation of transcription                                                                  | GO:0045449 | 1014.68 | 1198 | 2.36E-13 | up |
| Gene Ontology | regulation of gene expression                                                                | GO:0010468 | 1133.89 | 1325 | 2.77E-13 | up |
| Gene Ontology | transcription regulator activity                                                             | GO:0030528 | 583.814 | 728  | 2.83E-13 | up |
| Gene Ontology | establishment of localization                                                                | GO:0051234 | 1115.49 | 1303 | 5.81E-13 | up |
| Gene Ontology | cell part                                                                                    | GO:0044464 | 5775.27 | 5954 | 7.56E-13 | up |
| Gene Ontology | cell nucleobase, nucleoside, nucleotide and nucleic acid metabolic process                   | GO:0006139 | 1646.03 | 1860 | 1.06E-12 | up |
| Gene Ontology | transcription                                                                                | GO:0006350 | 1051.86 | 1233 | 1.06E-12 | up |
| Gene Ontology | cell surface receptor linked signaling pathway                                               | GO:0007166 | 573.847 | 713  | 1.39E-12 | up |
| Gene Ontology | positive regulation of gene expression                                                       | GO:0010628 | 242.265 | 334  | 3.82E-12 | up |
| Gene Ontology | transport                                                                                    | GO:0006810 | 1101.69 | 1281 | 5.34E-12 | up |
| Gene Ontology | cellular macromolecule biosynthetic process                                                  | GO:0034645 | 1352.78 | 1545 | 8.82E-12 | up |
| Gene Ontology | regulation of cell communication                                                             | GO:0010646 | 449.648 | 570  | 9.46E-12 | up |
| Gene Ontology | macromolecule biosynthetic process                                                           | GO:0009059 | 1378.84 | 1572 | 9.68E-12 | up |
| Gene Ontology | protein modification process                                                                 | GO:0006464 | 677.73  | 822  | 1.07E-11 | up |
| Gene Ontology | positive regulation of macromolecule biosynthetic process                                    | GO:0010557 | 269.099 | 363  | 1.51E-11 | up |
| Gene Ontology | positive regulation of nucleobase, nucleoside, nucleotide and nucleic acid metabolic process | GO:0045935 | 260.665 | 353  | 1.64E-11 | up |
| Gene Ontology | nitrogen compound metabolic process                                                          | GO:0006807 | 1800.89 | 2010 | 1.77E-11 | up |
| Gene Ontology | positive regulation of cellular biosynthetic process                                         | GO:0031328 | 285.965 | 382  | 2.02E-11 | up |
| Gene Ontology | cellular nitrogen compound metabolic process                                                 | GO:0034641 | 1757.19 | 1963 | 2.66E-11 | up |
| Gene Ontology | cellular component organization                                                              | GO:0016043 | 1076.39 | 1248 | 3.06E-11 | up |
| Gene Ontology | positive regulation of biosynthetic                                                          | GO:0009891 | 290.182 | 386  | 3.15E-11 | up |



|               | process                                                     |            |         |      |          |    |  |
|---------------|-------------------------------------------------------------|------------|---------|------|----------|----|--|
| Gene Ontology | positive regulation of transcription                        | GO:0045941 | 229.616 | 315  | 3.97E-11 | up |  |
| Gene Ontology | cytoplasmic part                                            | GO:0044444 | 1987.19 | 2199 | 3.99E-11 | up |  |
| Gene Ontology | regulation of signaling pathway                             | GO:0035466 | 391.765 | 501  | 4.83E-11 | up |  |
| Gene Ontology | positive regulation of nitrogen compound metabolic process  | GO:0051173 | 268.715 | 360  | 5.67E-11 | up |  |
| Gene Ontology | macromolecule localization                                  | GO:0033036 | 481.464 | 601  | 5.91E-11 | up |  |
| Gene Ontology | macromolecule modification                                  | GO:0043412 | 708.397 | 849  | 9.58E-11 | up |  |
| Gene Ontology | transcription, DNA-dependent                                | GO:0006351 | 747.113 | 890  | 1.34E-10 | up |  |
| Gene Ontology | regulation of transcription, DNA-dependent                  | GO:0006355 | 697.663 | 835  | 2.15E-10 | up |  |
| Gene Ontology | RNA biosynthetic process                                    | GO:0032774 | 748.646 | 890  | 2.31E-10 | up |  |
| Gene Ontology | regulation of RNA metabolic process                         | GO:0051252 | 716.446 | 854  | 3.39E-10 | up |  |
| Gene Ontology | negative regulation of cellular process                     | GO:0048523 | 722.963 | 861  | 3.42E-10 | up |  |
| Gene Ontology | nucleic acid metabolic process                              | GO:0090304 | 1427.53 | 1608 | 4.56E-10 | up |  |
| Gene Ontology | post-translational protein modification                     | GO:0043687 | 578.447 | 702  | 6.05E-10 | up |  |
| Gene Ontology | neurogenesis                                                | GO:0022008 | 247.632 | 331  | 6.39E-10 | up |  |
| Gene Ontology | small GTPase mediated signal transduction                   | GO:0007264 | 165.983 | 234  | 1.14E-09 | up |  |
| Gene Ontology | metal ion binding                                           | GO:0046872 | 1451.29 | 1628 | 1.51E-09 | up |  |
| Gene Ontology | central nervous system development                          | GO:0007417 | 177.482 | 247  | 1.76E-09 | up |  |
| Gene Ontology | regulation of transcription from RNA polymerase II promoter | GO:0006357 | 291.332 | 379  | 2.01E-09 | up |  |
| Gene Ontology | insoluble fraction                                          | GO:0005626 | 318.165 | 409  | 2.56E-09 | up |  |
| Gene Ontology | intrinsic to plasma membrane                                | GO:0031226 | 463.064 | 571  | 2.65E-09 | up |  |
| Gene Ontology | endomembrane system                                         | GO:0012505 | 556.981 | 674  | 2.96E-09 | up |  |
| Gene Ontology | cation binding                                              | GO:0043169 | 1466.63 | 1641 | 3.00E-09 | up |  |
| Gene Ontology | positive regulation of transcription, DNA-dependent         | GO:0045893 | 197.799 | 270  | 3.04E-09 | up |  |
| Gene Ontology | vasculature development                                     | GO:0001944 | 133.399 | 193  | 3.41E-09 | up |  |
| Gene Ontology | transcription factor activity                               | GO:0003700 | 369.532 | 466  | 3.60E-09 | up |  |
| Gene Ontology | regulation of biological quality                            | GO:0065008 | 660.48  | 786  | 3.60E-09 | up |  |
| Gene Ontology | ion binding                                                 | GO:0043167 | 1470.46 | 1644 | 3.65E-09 | up |  |
| Gene Ontology | enzyme linked receptor protein signaling pathway            | GO:0007167 | 182.082 | 250  | 7.22E-09 | up |  |
| Gene Ontology | cellular component movement                                 | GO:0006928 | 250.315 | 329  | 8.50E-09 | up |  |
| Gene Ontology | purine nucleotide binding                                   | GO:0017076 | 741.363 | 870  | 1.01E-08 | up |  |
| Gene Ontology | integral to plasma membrane                                 | GO:0005887 | 454.631 | 558  | 1.03E-08 | up |  |
| Gene Ontology | transcription from RNA polymerase II promoter               | GO:0006366 | 352.282 | 444  | 1.10E-08 | up |  |

|               |                                                                         |            |         |      |          |      |
|---------------|-------------------------------------------------------------------------|------------|---------|------|----------|------|
| Gene Ontology | ribonucleotide binding                                                  | GO:0032553 | 709.547 | 835  | 1.24E-08 | up   |
| Gene Ontology | purine ribonucleotide binding                                           | GO:0032555 | 709.547 | 835  | 1.24E-08 | up   |
| Gene Ontology | positive regulation of RNA<br>metabolic process                         | GO:0051254 | 200.099 | 270  | 1.31E-08 | up   |
| Gene Ontology | cell migration                                                          | GO:0016477 | 177.099 | 243  | 1.33E-08 | up   |
| Gene Ontology | Golgi apparatus                                                         | GO:0005794 | 342.315 | 432  | 1.51E-08 | up   |
| Gene Ontology | blood vessel development                                                | GO:0001568 | 130.333 | 187  | 1.52E-08 | up   |
| Gene Ontology | receptor activity                                                       | GO:0004872 | 647.064 | 530  | 1.69E-08 | down |
| Gene Ontology | organ morphogenesis                                                     | GO:0009887 | 252.615 | 330  | 1.79E-08 | up   |
| Gene Ontology | positive regulation of<br>macromolecule metabolic process               | GO:0010604 | 374.132 | 467  | 1.88E-08 | up   |
| Gene Ontology | gland development                                                       | GO:0048732 | 78.1996 | 122  | 2.19E-08 | up   |
| Gene Ontology | cell surface                                                            | GO:0009986 | 134.166 | 191  | 2.25E-08 | up   |
| Gene Ontology | positive regulation of transcription<br>from RNA polymerase II promoter | GO:0045944 | 152.566 | 213  | 2.27E-08 | up   |
| Gene Ontology | protein localization                                                    | GO:0008104 | 401.731 | 497  | 2.43E-08 | up   |
| Gene Ontology | cytoskeletal protein binding                                            | GO:0008092 | 196.266 | 264  | 2.86E-08 | up   |
| Gene Ontology | negative regulation of biological<br>process                            | GO:0048519 | 791.196 | 919  | 3.38E-08 | up   |
| Gene Ontology | adenyl nucleotide binding                                               | GO:0030554 | 607.197 | 721  | 3.42E-08 | up   |
| Gene Ontology | phosphorus metabolic process                                            | GO:0006793 | 501.398 | 605  | 4.54E-08 | up   |
| Gene Ontology | phosphate metabolic process                                             | GO:0006796 | 501.398 | 605  | 4.54E-08 | up   |
| Gene Ontology | purine nucleoside binding                                               | GO:0001883 | 620.997 | 735  | 4.55E-08 | up   |
| Gene Ontology | nucleoside binding                                                      | GO:0001882 | 624.83  | 739  | 4.73E-08 | up   |
| Gene Ontology | protein amino acid<br>phosphorylation                                   | GO:0006468 | 309.348 | 392  | 4.97E-08 | up   |
| Gene Ontology | adenyl ribonucleotide binding                                           | GO:0032559 | 576.147 | 686  | 5.10E-08 | up   |
| Gene Ontology | generation of neurons                                                   | GO:0048699 | 230.382 | 302  | 5.75E-08 | up   |
| Gene Ontology | membrane fraction                                                       | GO:0005624 | 306.282 | 388  | 6.22E-08 | up   |
| Gene Ontology | zinc ion binding                                                        | GO:0008270 | 770.113 | 894  | 6.49E-08 | up   |
| Gene Ontology | DNA binding                                                             | GO:0003677 | 898.912 | 1031 | 6.76E-08 | up   |
| Gene Ontology | transferase activity, transferring<br>phosphorus-containing groups      | GO:0016772 | 343.082 | 429  | 6.76E-08 | up   |
| Gene Ontology | transmembrane receptor protein<br>tyrosine kinase signaling pathway     | GO:0007169 | 113.466 | 164  | 7.85E-08 | up   |
| Gene Ontology | regulation of signal transduction                                       | GO:0009966 | 302.449 | 383  | 8.16E-08 | up   |
| Gene Ontology | positive regulation of metabolic<br>process                             | GO:0009893 | 403.265 | 495  | 9.29E-08 | up   |
| Gene Ontology | cell motility                                                           | GO:0048870 | 189.749 | 254  | 9.71E-08 | up   |
| Gene Ontology | localization of cell                                                    | GO:0051674 | 189.749 | 254  | 9.71E-08 | up   |
| Gene Ontology | positive regulation of cellular<br>metabolic process                    | GO:0031325 | 382.948 | 472  | 1.12E-07 | up   |
| Gene Ontology | regulation of signaling process                                         | GO:0023051 | 304.365 | 384  | 1.31E-07 | up   |
| Gene Ontology | neuron differentiation                                                  | GO:0030182 | 209.299 | 276  | 1.32E-07 | up   |

|               |                                                             |            |         |      |          |      |
|---------------|-------------------------------------------------------------|------------|---------|------|----------|------|
| Gene Ontology | kinase activity                                             | GO:0016301 | 294.782 | 373  | 1.44E-07 | up   |
| Gene Ontology | ATP binding                                                 | GO:0005524 | 567.331 | 673  | 1.44E-07 | up   |
| Gene Ontology | nucleus                                                     | GO:0005634 | 1992.56 | 2165 | 1.50E-07 | up   |
| Gene Ontology | transition metal ion binding                                | GO:0046914 | 875.912 | 1003 | 1.66E-07 | up   |
| Gene Ontology | phosphotransferase activity,<br>alcohol group as acceptor   | GO:0016773 | 271.399 | 346  | 1.87E-07 | up   |
| Gene Ontology | <b>cell junction</b>                                        | GO:0030054 | 206.616 | 272  | 2.04E-07 | up   |
| Gene Ontology | regulation of localization                                  | GO:0032879 | 284.049 | 360  | 2.08E-07 | up   |
| Gene Ontology | <b>Ras protein signal transduction</b>                      | GO:0007265 | 87.7829 | 131  | 2.20E-07 | up   |
| Gene Ontology | enzyme binding                                              | GO:0019899 | 245.715 | 316  | 2.80E-07 | up   |
| Gene Ontology | tissue development                                          | GO:0009888 | 317.015 | 396  | 3.09E-07 | up   |
| Gene Ontology | anatomical structure formation<br>involved in morphogenesis | GO:0048646 | 180.932 | 241  | 4.06E-07 | up   |
| Gene Ontology | <b>Wnt receptor signaling pathway</b>                       | GO:0016055 | 72.4496 | 111  | 4.35E-07 | up   |
| Gene Ontology | transmembrane receptor protein<br>kinase activity           | GO:0019199 | 31.4332 | 57   | 4.55E-07 | up   |
| Gene Ontology | cell fraction                                               | GO:0000267 | 412.848 | 501  | 4.56E-07 | up   |
| Gene Ontology | <b>cell adhesion</b>                                        | GO:0007155 | 317.015 | 395  | 4.56E-07 | up   |
| Gene Ontology | cell development                                            | GO:0048468 | 308.198 | 385  | 4.84E-07 | up   |
| Gene Ontology | nucleotide binding                                          | GO:0000166 | 865.179 | 987  | 5.26E-07 | up   |
| Gene Ontology | embryonic development                                       | GO:0009790 | 239.965 | 308  | 5.30E-07 | up   |
| Gene Ontology | biological adhesion                                         | GO:0022610 | 317.398 | 395  | 5.30E-07 | up   |
| Gene Ontology | tissue morphogenesis                                        | GO:0048729 | 111.933 | 159  | 5.92E-07 | up   |
| Gene Ontology | urogenital system development                               | GO:0001655 | 56.3497 | 90   | 6.41E-07 | up   |
| Gene Ontology | cell morphogenesis                                          | GO:0000902 | 164.833 | 221  | 7.82E-07 | up   |
| Gene Ontology | regulation of cellular component<br>organization            | GO:0051128 | 211.982 | 275  | 9.06E-07 | up   |
| Gene Ontology | organelle membrane                                          | GO:0031090 | 729.863 | 841  | 9.20E-07 | up   |
| Gene Ontology | cell projection organization                                | GO:0030030 | 175.566 | 233  | 9.81E-07 | up   |
| Gene Ontology | morphogenesis of an epithelium                              | GO:0002009 | 85.4829 | 126  | 1.05E-06 | up   |
| Gene Ontology | synapse                                                     | GO:0045202 | 142.216 | 194  | 1.05E-06 | up   |
| Gene Ontology | regulation of developmental<br>process                      | GO:0050793 | 309.348 | 384  | 1.16E-06 | up   |
| Gene Ontology | cell proliferation                                          | GO:0008283 | 447.731 | 536  | 1.29E-06 | up   |
| Gene Ontology | heart development                                           | GO:0007507 | 93.1495 | 135  | 1.37E-06 | up   |
| Gene Ontology | cell projection                                             | GO:0042995 | 293.632 | 366  | 1.39E-06 | up   |
| Gene Ontology | basolateral plasma membrane                                 | GO:0016323 | 85.8662 | 126  | 1.46E-06 | up   |
| Gene Ontology | protein domain specific binding                             | GO:0019904 | 150.649 | 203  | 1.69E-06 | up   |
| Gene Ontology | defense response to bacterium                               | GO:0042742 | 46.3831 | 19   | 1.72E-06 | down |
| Gene Ontology | brain development                                           | GO:0007420 | 121.899 | 169  | 1.88E-06 | up   |
| Gene Ontology | cellular response to stimulus                               | GO:0051716 | 422.431 | 507  | 2.01E-06 | up   |
| Gene Ontology | transcription activator activity                            | GO:0016563 | 164.833 | 219  | 2.15E-06 | up   |
| Gene Ontology | <b>cell-cell signaling</b>                                  | GO:0007267 | 275.999 | 345  | 2.31E-06 | up   |
| Gene Ontology | Golgi apparatus part                                        | GO:0044431 | 206.999 | 267  | 2.54E-06 | up   |

|               |                                                     |            |         |      |          |      |
|---------------|-----------------------------------------------------|------------|---------|------|----------|------|
| Gene Ontology | blood vessel morphogenesis                          | GO:0048514 | 113.083 | 158  | 2.54E-06 | up   |
| Gene Ontology | embryonic morphogenesis                             | GO:0048598 | 133.399 | 182  | 2.58E-06 | up   |
| Gene Ontology | cellular protein metabolic process                  | GO:0044267 | 944.912 | 1064 | 2.77E-06 | up   |
| Gene Ontology | locomotion                                          | GO:0040011 | 236.516 | 300  | 3.04E-06 | up   |
| Gene Ontology | endosome                                            | GO:0005768 | 148.349 | 199  | 3.34E-06 | up   |
| Gene Ontology | membrane                                            | GO:0016020 | 2792.95 | 2960 | 3.50E-06 | up   |
| Gene Ontology | RNA metabolic process                               | GO:0016070 | 995.128 | 1115 | 4.12E-06 | up   |
| Gene Ontology | <b>canonical Wnt receptor signaling pathway</b>     | GO:0060070 | 30.6665 | 54   | 4.38E-06 | up   |
| Gene Ontology | regulation of apoptosis                             | GO:0042981 | 340.782 | 415  | 4.56E-06 | up   |
| Gene Ontology | receptor signaling protein activity                 | GO:0005057 | 61.333  | 94   | 4.59E-06 | up   |
| Gene Ontology | regulation of cell death                            | GO:0010941 | 346.532 | 421  | 5.10E-06 | up   |
| Gene Ontology | regulation of cell proliferation                    | GO:0042127 | 326.598 | 399  | 5.14E-06 | up   |
| Gene Ontology | regulation of programmed cell death                 | GO:0043067 | 343.848 | 418  | 5.14E-06 | up   |
| Gene Ontology | Golgi membrane                                      | GO:0000139 | 172.499 | 226  | 5.16E-06 | up   |
| Gene Ontology | neuron projection                                   | GO:0043005 | 142.216 | 191  | 5.16E-06 | up   |
| Gene Ontology | cellular component morphogenesis                    | GO:0032989 | 181.316 | 236  | 5.41E-06 | up   |
| Gene Ontology | transmission of nerve impulse                       | GO:0019226 | 161.383 | 213  | 5.69E-06 | up   |
| Gene Ontology | membrane organization                               | GO:0061024 | 170.966 | 224  | 5.74E-06 | up   |
| Gene Ontology | neurological system process                         | GO:0050877 | 487.598 | 403  | 6.45E-06 | down |
| Gene Ontology | transferase activity                                | GO:0016740 | 648.213 | 746  | 6.81E-06 | up   |
| Gene Ontology | intermediate filament cytoskeleton                  | GO:0045111 | 71.683  | 39   | 7.12E-06 | down |
| Gene Ontology | negative regulation of transcription, DNA-dependent | GO:0045892 | 158.316 | 209  | 7.12E-06 | up   |
| Gene Ontology | cellular localization                               | GO:0051641 | 462.298 | 546  | 7.40E-06 | up   |
| Gene Ontology | cellular membrane organization                      | GO:0016044 | 170.582 | 223  | 7.42E-06 | up   |
| Gene Ontology | regulation of cell differentiation                  | GO:0045595 | 215.816 | 274  | 9.03E-06 | up   |
| Gene Ontology | growth                                              | GO:0040007 | 206.999 | 264  | 9.16E-06 | up   |
| Gene Ontology | gene expression                                     | GO:0010467 | 1458.96 | 1593 | 9.81E-06 | up   |
| Gene Ontology | RNA polymerase II transcription factor activity     | GO:0003702 | 91.6162 | 130  | 1.02E-05 | up   |
| Gene Ontology | cell-substrate adhesion                             | GO:0031589 | 58.2664 | 89   | 1.11E-05 | up   |
| Gene Ontology | active transmembrane transporter activity           | GO:0022804 | 131.483 | 177  | 1.11E-05 | up   |
| Gene Ontology | intermediate filament                               | GO:0005882 | 68.233  | 37   | 1.20E-05 | down |
| Gene Ontology | external side of plasma membrane                    | GO:0009897 | 53.6664 | 83   | 1.30E-05 | up   |
| Gene Ontology | phosphorylation                                     | GO:0016310 | 437.381 | 517  | 1.34E-05 | up   |
| Gene Ontology | establishment of protein localization               | GO:0045184 | 346.532 | 418  | 1.35E-05 | up   |
| Gene Ontology | cell-matrix adhesion                                | GO:0007160 | 45.9998 | 73   | 1.57E-05 | up   |
| Gene Ontology | skeletal system development                         | GO:0001501 | 146.816 | 194  | 1.66E-05 | up   |
| Gene Ontology | mitochondrial respiratory chain                     | GO:0005746 | 26.8332 | 8    | 1.68E-05 | down |

|               |                                                           |            |         |      |          |      |
|---------------|-----------------------------------------------------------|------------|---------|------|----------|------|
| Gene Ontology | cell morphogenesis involved in differentiation            | GO:0000904 | 116.916 | 159  | 1.86E-05 | up   |
| Gene Ontology | negative regulation of RNA metabolic process              | GO:0051253 | 160.999 | 210  | 1.91E-05 | up   |
| Gene Ontology | morphogenesis of a branching structure                    | GO:0001763 | 50.9831 | 79   | 2.13E-05 | up   |
| Gene Ontology | protein kinase activity                                   | GO:0004672 | 227.699 | 285  | 2.34E-05 | up   |
| Gene Ontology | regulation of multicellular organismal process            | GO:0051239 | 416.298 | 492  | 2.54E-05 | up   |
| Gene Ontology | morphogenesis of a branching epithelium                   | GO:0061138 | 43.3165 | 69   | 2.54E-05 | up   |
| Gene Ontology | respiratory chain                                         | GO:0070469 | 29.5165 | 10   | 2.58E-05 | down |
| Gene Ontology | kidney development                                        | GO:0001822 | 41.0165 | 66   | 2.59E-05 | up   |
| Gene Ontology | vesicle-mediated transport                                | GO:0016192 | 257.599 | 318  | 2.62E-05 | up   |
| Gene Ontology | translational elongation                                  | GO:0006414 | 39.8665 | 17   | 2.66E-05 | down |
| Gene Ontology | neuron development                                        | GO:0048666 | 152.949 | 200  | 2.71E-05 | up   |
| Gene Ontology | neuron projection morphogenesis                           | GO:0048812 | 94.6829 | 132  | 2.79E-05 | up   |
| Gene Ontology | anchoring junction                                        | GO:0070161 | 62.483  | 93   | 2.80E-05 | up   |
| Gene Ontology | plasma membrane                                           | GO:0005886 | 1440.94 | 1568 | 2.97E-05 | up   |
| Gene Ontology | forebrain development                                     | GO:0030900 | 66.6997 | 98   | 3.22E-05 | up   |
| Gene Ontology | ribosomal subunit                                         | GO:0033279 | 46.3831 | 22   | 3.85E-05 | down |
| Gene Ontology | renal system development                                  | GO:0072001 | 42.1665 | 67   | 3.96E-05 | up   |
| Gene Ontology | actin cytoskeleton organization                           | GO:0030036 | 108.866 | 148  | 4.31E-05 | up   |
| Gene Ontology | negative regulation of transcription                      | GO:0016481 | 196.266 | 248  | 4.60E-05 | up   |
| Gene Ontology | adherens junction                                         | GO:0005912 | 55.9664 | 84   | 5.67E-05 | up   |
| Gene Ontology | cell morphogenesis involved in neuron differentiation     | GO:0048667 | 92.3829 | 128  | 6.00E-05 | up   |
| Gene Ontology | catalytic activity                                        | GO:0003824 | 1992.56 | 2129 | 6.39E-05 | up   |
| Gene Ontology | cellular response to organic substance                    | GO:0071310 | 103.499 | 141  | 6.39E-05 | up   |
| Gene Ontology | regulation of cellular component movement                 | GO:0051270 | 94.2995 | 130  | 7.00E-05 | up   |
| Gene Ontology | negative regulation of cellular biosynthetic process      | GO:0031327 | 241.115 | 297  | 7.09E-05 | up   |
| Gene Ontology | neuron projection development                             | GO:0031175 | 123.433 | 164  | 7.21E-05 | up   |
| Gene Ontology | sequence-specific DNA binding                             | GO:0043565 | 248.399 | 305  | 7.24E-05 | up   |
| Gene Ontology | cell leading edge                                         | GO:0031252 | 64.3997 | 94   | 7.42E-05 | up   |
| Gene Ontology | negative regulation of macromolecule biosynthetic process | GO:0010558 | 234.216 | 289  | 7.97E-05 | up   |
| Gene Ontology | extracellular region                                      | GO:0005576 | 780.463 | 687  | 8.47E-05 | down |
| Gene Ontology | chordate embryonic development                            | GO:0043009 | 143.749 | 187  | 8.59E-05 | up   |
| Gene Ontology | cellular response to endogenous stimulus                  | GO:0071495 | 72.833  | 104  | 8.66E-05 | up   |

|               |                                                         |            |         |     |          |      |
|---------------|---------------------------------------------------------|------------|---------|-----|----------|------|
| Gene Ontology | <b>apoptosis</b>                                        | GO:0006915 | 434.315 | 507 | 8.85E-05 | up   |
| Gene Ontology | ribonucleoprotein complex                               | GO:0030529 | 193.199 | 145 | 9.18E-05 | down |
| Gene Ontology | cell death                                              | GO:0008219 | 479.164 | 555 | 9.26E-05 | up   |
| Gene Ontology | programmed cell death                                   | GO:0012501 | 437.381 | 510 | 9.54E-05 | up   |
| Gene Ontology | regulation of phosphate metabolic process               | GO:0019220 | 213.132 | 265 | 9.54E-05 | up   |
| Gene Ontology | regulation of phosphorus metabolic process              | GO:0051174 | 213.132 | 265 | 9.54E-05 | up   |
| Gene Ontology | cytoskeleton organization                               | GO:0007010 | 202.399 | 253 | 9.54E-05 | up   |
| Gene Ontology | synaptic transmission                                   | GO:0007268 | 138.766 | 181 | 9.61E-05 | up   |
| Gene Ontology | death                                                   | GO:0016265 | 480.314 | 556 | 9.66E-05 | up   |
| Gene Ontology | cyclic-nucleotide phosphodiesterase activity            | GO:0004112 | 9.58329 | 21  | 0.000102 | up   |
| Gene Ontology | negative regulation of biosynthetic process             | GO:0009890 | 244.949 | 300 | 0.000107 | up   |
| Gene Ontology | intracellular protein kinase cascade                    | GO:0007243 | 228.849 | 282 | 0.000112 | up   |
| Gene Ontology | signal transmission via phosphorylation event           | GO:0023014 | 228.849 | 282 | 0.000112 | up   |
| Gene Ontology | DNA regulatory region binding                           | GO:0044212 | 47.9164 | 73  | 0.000112 | up   |
| Gene Ontology | muscle organ development                                | GO:0007517 | 98.5162 | 134 | 0.000115 | up   |
| Gene Ontology | embryonic development ending in birth or egg hatching   | GO:0009792 | 145.283 | 188 | 0.000117 | up   |
| Gene Ontology | anterior/posterior pattern formation                    | GO:0009952 | 59.4164 | 87  | 0.000134 | up   |
| Gene Ontology | transmembrane receptor protein tyrosine kinase activity | GO:0004714 | 24.9165 | 43  | 0.000136 | up   |
| Gene Ontology | growth factor binding                                   | GO:0019838 | 42.5498 | 66  | 0.000136 | up   |
| Gene Ontology | axonogenesis                                            | GO:0007409 | 83.5663 | 116 | 0.00014  | up   |
| Gene Ontology | negative regulation of cell communication               | GO:0010648 | 129.183 | 169 | 0.000153 | up   |
| Gene Ontology | mitochondrial membrane part                             | GO:0044455 | 50.9831 | 27  | 0.000156 | down |
| Gene Ontology | actin filament-based process                            | GO:0030029 | 115.383 | 153 | 0.000159 | up   |
| Gene Ontology | cell projection morphogenesis                           | GO:0048858 | 108.483 | 145 | 0.000159 | up   |
| Gene Ontology | protein transport                                       | GO:0015031 | 340.398 | 403 | 0.000173 | up   |
| Gene Ontology | PDZ domain binding                                      | GO:0030165 | 20.6999 | 37  | 0.000174 | up   |
| Gene Ontology | cell part morphogenesis                                 | GO:0032990 | 113.849 | 151 | 0.000178 | up   |
| Gene Ontology | protein serine/threonine kinase activity                | GO:0004674 | 162.916 | 207 | 0.000179 | up   |
| Gene Ontology | glycoprotein metabolic process                          | GO:0009100 | 79.7329 | 111 | 0.00018  | up   |
| Gene Ontology | cytoplasmic vesicle                                     | GO:0031410 | 263.732 | 319 | 0.000187 | up   |
| Gene Ontology | membrane raft                                           | GO:0045121 | 58.2664 | 85  | 0.000199 | up   |
| Gene Ontology | 3',5'-cyclic-nucleotide phosphodiesterase activity      | GO:0004114 | 9.19996 | 20  | 0.000208 | up   |

|               |                                                                                                |            |         |      |          |      |
|---------------|------------------------------------------------------------------------------------------------|------------|---------|------|----------|------|
| Gene Ontology | muscle structure development                                                                   | GO:0061061 | 117.683 | 155  | 0.000218 | up   |
| Gene Ontology | vesicle                                                                                        | GO:0031982 | 275.232 | 331  | 0.000229 | up   |
| Gene Ontology | extracellular structure organization                                                           | GO:0043062 | 66.6997 | 95   | 0.000231 | up   |
| Gene Ontology | <b>regulation of Wnt receptor signaling pathway</b>                                            | GO:0030111 | 35.2665 | 56   | 0.000244 | up   |
| Gene Ontology | negative regulation of nucleobase, nucleoside, nucleotide and nucleic acid metabolic process   | GO:0045934 | 220.032 | 270  | 0.000246 | up   |
| Gene Ontology | response to endogenous stimulus                                                                | GO:0009719 | 196.649 | 244  | 0.000247 | up   |
| Gene Ontology | endoplasmic reticulum                                                                          | GO:0005783 | 392.531 | 458  | 0.000249 | up   |
| Gene Ontology | promoter binding                                                                               | GO:0010843 | 46.3831 | 70   | 0.000252 | up   |
| Gene Ontology | angiogenesis                                                                                   | GO:0001525 | 90.4662 | 123  | 0.000261 | up   |
| Gene Ontology | regulation of molecular function                                                               | GO:0065009 | 414.381 | 481  | 0.000285 | up   |
| Gene Ontology | establishment of localization in cell                                                          | GO:0051649 | 427.798 | 495  | 0.000317 | up   |
| Gene Ontology | apical part of cell                                                                            | GO:0045177 | 79.7329 | 110  | 0.000321 | up   |
| Gene Ontology | integrin-mediated signaling pathway                                                            | GO:0007229 | 21.8499 | 38   | 0.000333 | up   |
| Gene Ontology | protein metabolic process                                                                      | GO:0019538 | 1125.08 | 1227 | 0.000333 | up   |
| Gene Ontology | reproductive developmental process                                                             | GO:0003006 | 114.999 | 151  | 0.000334 | up   |
| Gene Ontology | negative regulation of cell death                                                              | GO:0060548 | 159.083 | 201  | 0.000353 | up   |
| Gene Ontology | regulation of cell migration                                                                   | GO:0030334 | 85.0996 | 116  | 0.000384 | up   |
| Gene Ontology | positive regulation of cellular component organization                                         | GO:0051130 | 88.5496 | 120  | 0.000394 | up   |
| Gene Ontology | endocrine system development                                                                   | GO:0035270 | 31.0498 | 50   | 0.000399 | up   |
| Gene Ontology | endocytosis                                                                                    | GO:0006897 | 105.799 | 140  | 0.000402 | up   |
| Gene Ontology | membrane invagination                                                                          | GO:0010324 | 105.799 | 140  | 0.000402 | up   |
| Gene Ontology | dephosphorylation                                                                              | GO:0016311 | 67.4663 | 95   | 0.000402 | up   |
| Gene Ontology | phosphoric ester hydrolase activity                                                            | GO:0042578 | 131.099 | 169  | 0.000402 | up   |
| Gene Ontology | anaphase-promoting complex-dependent proteasomal ubiquitin-dependent protein catabolic process | GO:0031145 | 24.5332 | 9    | 0.000431 | down |
| Gene Ontology | GTPase regulator activity                                                                      | GO:0030695 | 161.383 | 203  | 0.000443 | up   |
| Gene Ontology | identical protein binding                                                                      | GO:0042802 | 267.182 | 320  | 0.000449 | up   |
| Gene Ontology | cell projection part                                                                           | GO:0044463 | 138.383 | 177  | 0.000451 | up   |
| Gene Ontology | regulation of anatomical structure morphogenesis                                               | GO:0022603 | 119.983 | 156  | 0.000458 | up   |
| Gene Ontology | keratin filament                                                                               | GO:0045095 | 34.4998 | 16   | 0.000458 | down |
| Gene Ontology | reproductive structure development                                                             | GO:0048608 | 65.1663 | 92   | 0.000463 | up   |
| Gene Ontology | enzyme activator activity                                                                      | GO:0008047 | 134.166 | 172  | 0.000492 | up   |
| Gene Ontology | cytosolic ribosome                                                                             | GO:0022626 | 28.7499 | 12   | 0.000495 | down |

|               |                                                                      |            |         |     |          |      |
|---------------|----------------------------------------------------------------------|------------|---------|-----|----------|------|
| Gene Ontology | structural constituent of ribosome                                   | GO:0003735 | 60.5664 | 36  | 0.000498 | down |
| Gene Ontology | SH3 domain binding                                                   | GO:0017124 | 38.3331 | 59  | 0.000501 | up   |
| Gene Ontology | glycoprotein biosynthetic process                                    | GO:0009101 | 62.8664 | 89  | 0.000536 | up   |
| Gene Ontology | negative regulation of cellular metabolic process                    | GO:0031324 | 310.115 | 366 | 0.000552 | up   |
| Gene Ontology | negative regulation of apoptosis                                     | GO:0043066 | 154.866 | 195 | 0.000571 | up   |
| Gene Ontology | negative regulation of nitrogen compound metabolic process           | GO:0051172 | 222.332 | 270 | 0.000571 | up   |
| Gene Ontology | negative regulation of gene expression                               | GO:0010629 | 219.649 | 267 | 0.000579 | up   |
| Gene Ontology | small ribosomal subunit                                              | GO:0015935 | 22.6166 | 8   | 0.000589 | down |
| Gene Ontology | nucleoside-triphosphatase regulator activity                         | GO:0060589 | 164.833 | 206 | 0.00061  | up   |
| Gene Ontology | ruffle                                                               | GO:0001726 | 29.1332 | 47  | 0.000616 | up   |
| Gene Ontology | negative regulation of cellular component movement                   | GO:0051271 | 28.3665 | 46  | 0.000617 | up   |
| Gene Ontology | homeostatic process                                                  | GO:0042592 | 323.532 | 380 | 0.000634 | up   |
| Gene Ontology | negative regulation of transcription from RNA polymerase II promoter | GO:0000122 | 111.933 | 146 | 0.000646 | up   |
| Gene Ontology | negative regulation of signaling process                             | GO:0023057 | 48.2998 | 71  | 0.00066  | up   |
| Gene Ontology | MAPKKK cascade                                                       | GO:0000165 | 114.616 | 149 | 0.000665 | up   |
| Gene Ontology | negative regulation of signal transduction                           | GO:0009968 | 47.5331 | 70  | 0.000686 | up   |
| Gene Ontology | regulation of phosphorylation                                        | GO:0042325 | 203.932 | 249 | 0.000716 | up   |
| Gene Ontology | ribosome                                                             | GO:0005840 | 75.8996 | 49  | 0.000725 | down |
| Gene Ontology | system process                                                       | GO:0003008 | 625.597 | 551 | 0.000732 | down |
| Gene Ontology | mitochondrial respiratory chain complex I                            | GO:0005747 | 17.6332 | 5   | 0.000732 | down |
| Gene Ontology | NADH dehydrogenase complex                                           | GO:0030964 | 17.6332 | 5   | 0.000732 | down |
| Gene Ontology | respiratory chain complex I                                          | GO:0045271 | 17.6332 | 5   | 0.000732 | down |
| Gene Ontology | synapse assembly                                                     | GO:0007416 | 18.0166 | 32  | 0.000733 | up   |
| Gene Ontology | cell projection assembly                                             | GO:0030031 | 37.9498 | 58  | 0.000733 | up   |
| Gene Ontology | fucosyltransferase activity                                          | GO:0008417 | 5.36664 | 13  | 0.000746 | up   |
| Gene Ontology | tube development                                                     | GO:0035295 | 130.716 | 167 | 0.000753 | up   |
| Gene Ontology | regulation of MAPKKK cascade                                         | GO:0043408 | 65.933  | 92  | 0.000775 | up   |
| Gene Ontology | regulation of cell morphogenesis                                     | GO:0022604 | 60.9497 | 86  | 0.000798 | up   |
| Gene Ontology | perinuclear region of cytoplasm                                      | GO:0048471 | 126.499 | 162 | 0.000827 | up   |
| Gene Ontology | leading edge membrane                                                | GO:0031256 | 20.3166 | 35  | 0.000848 | up   |
| Gene Ontology | gland morphogenesis                                                  | GO:0022612 | 33.3498 | 52  | 0.000851 | up   |
| Gene Ontology | transmembrane transporter activity                                   | GO:0022857 | 346.915 | 404 | 0.000861 | up   |
| Gene Ontology | negative regulation of programmed cell death                         | GO:0043069 | 156.783 | 196 | 0.000861 | up   |



|               |                                                                  |            |         |      |          |      |
|---------------|------------------------------------------------------------------|------------|---------|------|----------|------|
| Gene Ontology | regulation of locomotion                                         | GO:0040012 | 94.2995 | 125  | 0.000875 | up   |
| Gene Ontology | response to organic substance                                    | GO:0010033 | 346.148 | 403  | 0.000897 | up   |
| Gene Ontology | developmental growth                                             | GO:0048589 | 62.8664 | 88   | 0.000945 | up   |
| Gene Ontology | molecular adaptor activity                                       | GO:0060090 | 26.4499 | 43   | 0.00095  | up   |
| Gene Ontology | pattern specification process                                    | GO:0007389 | 109.249 | 142  | 0.000955 | up   |
| Gene Ontology | membrane-bounded vesicle                                         | GO:0031988 | 256.832 | 306  | 0.000968 | up   |
| Gene Ontology | cytoplasmic membrane-bounded vesicle                             | GO:0016023 | 249.549 | 298  | 0.000983 | up   |
| Gene Ontology | cellular response to hormone stimulus                            | GO:0032870 | 69.7663 | 96   | 0.001049 | up   |
| Gene Ontology | cell-substrate junction                                          | GO:0030055 | 37.5665 | 57   | 0.00108  | up   |
| Gene Ontology | T cell activation involved in immune response                    | GO:0002286 | 9.19996 | 19   | 0.001107 | up   |
| Gene Ontology | response to chemical stimulus                                    | GO:0042221 | 581.13  | 652  | 0.00114  | up   |
| Gene Ontology | cell-substrate adherens junction regulation of ubiquitin-protein | GO:0005924 | 35.2665 | 54   | 0.001185 | up   |
| Gene Ontology | ligase activity involved in mitotic cell cycle                   | GO:0051439 | 26.0665 | 11   | 0.001216 | down |
| Gene Ontology | in utero embryonic development                                   | GO:0001701 | 86.2496 | 115  | 0.001219 | up   |
| Gene Ontology | calmodulin binding                                               | GO:0005516 | 54.0497 | 77   | 0.001225 | up   |
| Gene Ontology | beta-catenin binding                                             | GO:0008013 | 17.6332 | 31   | 0.00123  | up   |
| Gene Ontology | positive regulation of cell differentiation                      | GO:0045597 | 99.2828 | 130  | 0.001236 | up   |
| Gene Ontology | carboxylesterase activity                                        | GO:0004091 | 38.3331 | 20   | 0.001257 | down |
| Gene Ontology | protein amino acid dephosphorylation                             | GO:0006470 | 53.2831 | 76   | 0.001278 | up   |
| Gene Ontology | guanyl-nucleotide exchange factor activity                       | GO:0005085 | 57.4997 | 81   | 0.001331 | up   |
| Gene Ontology | regulation of transport                                          | GO:0051049 | 201.249 | 244  | 0.001368 | up   |
| Gene Ontology | NADH dehydrogenase activity                                      | GO:0003954 | 16.8666 | 5    | 0.001397 | down |
| Gene Ontology | NADH dehydrogenase (ubiquinone) activity                         | GO:0008137 | 16.8666 | 5    | 0.001397 | down |
| Gene Ontology | NADH dehydrogenase (quinone) activity                            | GO:0050136 | 16.8666 | 5    | 0.001397 | down |
| Gene Ontology | sensory perception of taste                                      | GO:0050909 | 16.8666 | 5    | 0.001397 | down |
| Gene Ontology | negative regulation of locomotion                                | GO:0040013 | 28.3665 | 45   | 0.001425 | up   |
| Gene Ontology | nucleic acid binding                                             | GO:0003676 | 1257.71 | 1354 | 0.001438 | up   |
| Gene Ontology | tubulin binding                                                  | GO:0015631 | 38.7165 | 58   | 0.001461 | up   |
| Gene Ontology | negative regulation of signaling pathway                         | GO:0035467 | 103.116 | 134  | 0.001461 | up   |
| Gene Ontology | ureteric bud development                                         | GO:0001657 | 22.9999 | 38   | 0.001462 | up   |
| Gene Ontology | epithelium development                                           | GO:0060429 | 142.983 | 179  | 0.001517 | up   |
| Gene Ontology | regulation of cell projection organization                       | GO:0031344 | 50.2164 | 72   | 0.001522 | up   |

|               |                                                                                           |            |         |      |          |      |
|---------------|-------------------------------------------------------------------------------------------|------------|---------|------|----------|------|
| Gene Ontology | cellular response to stress                                                               | GO:0033554 | 267.565 | 316  | 0.001542 | up   |
| Gene Ontology | organelle part                                                                            | GO:0044422 | 1950.77 | 2062 | 0.001564 | up   |
| Gene Ontology | synapse part                                                                              | GO:0044456 | 105.033 | 136  | 0.001579 | up   |
| Gene Ontology | response to hormone stimulus                                                              | GO:0009725 | 176.332 | 216  | 0.00158  | up   |
| Gene Ontology | axon cargo transport                                                                      | GO:0008088 | 4.98331 | 12   | 0.001606 | up   |
| Gene Ontology | secondary active transmembrane transporter activity                                       | GO:0015291 | 74.7496 | 101  | 0.001613 | up   |
| Gene Ontology | positive regulation of developmental process                                              | GO:0051094 | 136.083 | 171  | 0.001662 | up   |
| Gene Ontology | cellular macromolecule localization                                                       | GO:0070727 | 192.816 | 234  | 0.001687 | up   |
| Gene Ontology | regulation of protein amino acid phosphorylation                                          | GO:0001932 | 87.7829 | 116  | 0.001725 | up   |
| Gene Ontology | epithelial tube morphogenesis                                                             | GO:0060562 | 52.8997 | 75   | 0.001743 | up   |
| Gene Ontology | cellular protein localization                                                             | GO:0034613 | 192.049 | 233  | 0.001771 | up   |
| Gene Ontology | <b>focal adhesion</b>                                                                     | GO:0005925 | 33.3498 | 51   | 0.001812 | up   |
| Gene Ontology | regulation of cell development                                                            | GO:0060284 | 102.733 | 133  | 0.00185  | up   |
| Gene Ontology | axon                                                                                      | GO:0030424 | 68.233  | 93   | 0.001958 | up   |
| Gene Ontology | organelle organization                                                                    | GO:0006996 | 575.381 | 643  | 0.001981 | up   |
| Gene Ontology | apical plasma membrane                                                                    | GO:0016324 | 63.2497 | 87   | 0.002111 | up   |
| Gene Ontology | central nervous system neuron differentiation                                             | GO:0021953 | 27.9832 | 44   | 0.002164 | up   |
| Gene Ontology | negative regulation of cell migration                                                     | GO:0030336 | 26.4499 | 42   | 0.002239 | up   |
| Gene Ontology | negative regulation of ubiquitin-protein ligase activity involved in mitotic cell cycle   | GO:0051436 | 23.7666 | 10   | 0.002262 | down |
| Gene Ontology | protein binding, bridging                                                                 | GO:0030674 | 36.7998 | 55   | 0.002275 | up   |
| Gene Ontology | hexose transport                                                                          | GO:0008645 | 22.6166 | 37   | 0.002307 | up   |
| Gene Ontology | glucose transport                                                                         | GO:0015758 | 22.6166 | 37   | 0.002307 | up   |
| Gene Ontology | metal ion transport                                                                       | GO:0030001 | 190.132 | 230  | 0.002371 | up   |
| Gene Ontology | regionalization                                                                           | GO:0003002 | 86.6329 | 114  | 0.002372 | up   |
| Gene Ontology | intracellular organelle part                                                              | GO:0044446 | 1923.94 | 2031 | 0.002433 | up   |
| Gene Ontology | intracellular transport                                                                   | GO:0046907 | 288.649 | 337  | 0.002505 | up   |
| Gene Ontology | regulation of cell size                                                                   | GO:0008361 | 110.399 | 141  | 0.002516 | up   |
| Gene Ontology | early endosome                                                                            | GO:0005769 | 51.7497 | 73   | 0.002538 | up   |
| Gene Ontology | phosphoprotein phosphatase activity                                                       | GO:0004721 | 64.3997 | 88   | 0.002539 | up   |
| Gene Ontology | sex differentiation                                                                       | GO:0007548 | 67.8497 | 92   | 0.002607 | up   |
| Gene Ontology | oxidoreductase activity, acting on NADH or NADPH, quinone or similar compound as acceptor | GO:0016655 | 19.1666 | 7    | 0.002647 | down |
| Gene Ontology | regulation of kinase activity                                                             | GO:0043549 | 150.649 | 186  | 0.002647 | up   |
| Gene Ontology | cellular response to chemical                                                             | GO:0070887 | 172.499 | 210  | 0.002853 | up   |

|               | stimulus                                                                                |            |         |     |          |      |
|---------------|-----------------------------------------------------------------------------------------|------------|---------|-----|----------|------|
| Gene Ontology | cellular response to peptide hormone stimulus                                           | GO:0071375 | 38.7165 | 57  | 0.002921 | up   |
| Gene Ontology | protein phosphorylated amino acid binding                                               | GO:0045309 | 5.74997 | 13  | 0.002967 | up   |
| Gene Ontology | kinase binding                                                                          | GO:0019900 | 80.1163 | 106 | 0.002977 | up   |
| Gene Ontology | nucleoside-triphosphatase activity                                                      | GO:0017111 | 280.982 | 328 | 0.003021 | up   |
| Gene Ontology | epithelial cell development                                                             | GO:0002064 | 15.3333 | 27  | 0.003057 | up   |
| Gene Ontology | muscle cell migration                                                                   | GO:0014812 | 10.3499 | 20  | 0.003057 | up   |
| Gene Ontology | diencephalon development                                                                | GO:0021536 | 15.3333 | 27  | 0.003057 | up   |
| Gene Ontology | substrate-specific transmembrane transporter activity                                   | GO:0022891 | 315.482 | 365 | 0.003095 | up   |
| Gene Ontology | branching morphogenesis of a tube                                                       | GO:0048754 | 37.1832 | 55  | 0.003136 | up   |
| Gene Ontology | synapse organization                                                                    | GO:0050808 | 28.3665 | 44  | 0.003163 | up   |
| Gene Ontology | specific RNA polymerase II transcription factor activity                                | GO:0003704 | 16.0999 | 28  | 0.003192 | up   |
| Gene Ontology | cell growth                                                                             | GO:0016049 | 103.883 | 133 | 0.003207 | up   |
| Gene Ontology | chromatin binding                                                                       | GO:0003682 | 68.233  | 92  | 0.003257 | up   |
| Gene Ontology | regulation of cellular component biogenesis                                             | GO:0044087 | 60.5664 | 83  | 0.003271 | up   |
| Gene Ontology | ruffle membrane                                                                         | GO:0032587 | 11.1166 | 21  | 0.003505 | up   |
| Gene Ontology | positive regulation of ubiquitin-protein ligase activity involved in mitotic cell cycle | GO:0051437 | 24.5332 | 11  | 0.003558 | down |
| Gene Ontology | monosaccharide transport                                                                | GO:0015749 | 22.9999 | 37  | 0.00356  | up   |
| Gene Ontology | negative regulation of Wnt receptor signaling pathway                                   | GO:0030178 | 22.2332 | 36  | 0.003578 | up   |
| Gene Ontology | negative regulation of macromolecule metabolic process                                  | GO:0010605 | 317.015 | 366 | 0.003601 | up   |
| Gene Ontology | sensory organ development                                                               | GO:0007423 | 96.2162 | 124 | 0.00361  | up   |
| Gene Ontology | keratinization                                                                          | GO:0031424 | 15.7166 | 5   | 0.003615 | down |
| Gene Ontology | response to peptide hormone stimulus                                                    | GO:0043434 | 77.0496 | 102 | 0.00364  | up   |
| Gene Ontology | cell fate commitment                                                                    | GO:0045165 | 54.8164 | 76  | 0.003641 | up   |
| Gene Ontology | regulation of gene-specific transcription from RNA polymerase II promoter               | GO:0010551 | 62.483  | 85  | 0.003714 | up   |
| Gene Ontology | gene-specific transcription from RNA polymerase II promoter                             | GO:0032569 | 62.483  | 85  | 0.003714 | up   |
| Gene Ontology | muscle tissue development                                                               | GO:0060537 | 65.933  | 89  | 0.00379  | up   |
| Gene Ontology | regulation of small GTPase mediated signal transduction                                 | GO:0051056 | 104.266 | 133 | 0.003793 | up   |
| Gene Ontology | pituitary gland development                                                             | GO:0021983 | 11.8833 | 22  | 0.003849 | up   |

|               |                                                                        |            |         |      |          |      |
|---------------|------------------------------------------------------------------------|------------|---------|------|----------|------|
| Gene Ontology | <b>negative regulation of canonical Wnt receptor signaling pathway</b> | GO:0090090 | 11.8833 | 22   | 0.003849 | up   |
| Gene Ontology | GTPase activity                                                        | GO:0003924 | 81.6496 | 107  | 0.004188 | up   |
| Gene Ontology | positive regulation of cell communication                              | GO:0010647 | 160.999 | 196  | 0.004315 | up   |
| Gene Ontology | tube morphogenesis                                                     | GO:0035239 | 96.5995 | 124  | 0.00432  | up   |
| Gene Ontology | positive regulation of signaling pathway                               | GO:0035468 | 148.349 | 182  | 0.00432  | up   |
| Gene Ontology | endopeptidase inhibitor activity                                       | GO:0004866 | 57.4997 | 37   | 0.004336 | down |
| Gene Ontology | transmembrane receptor protein serine/threonine kinase activity        | GO:0004675 | 6.51663 | 14   | 0.004352 | up   |
| Gene Ontology | transforming growth factor beta receptor activity                      | GO:0005024 | 6.51663 | 14   | 0.004352 | up   |
| Gene Ontology | face development                                                       | GO:0060324 | 6.51663 | 14   | 0.004352 | up   |
| Gene Ontology | endopeptidase regulator activity                                       | GO:0061135 | 58.6497 | 38   | 0.004456 | down |
| Gene Ontology | glucose import                                                         | GO:0046323 | 13.4166 | 24   | 0.00452  | up   |
| Gene Ontology | substrate-specific transporter activity                                | GO:0022892 | 369.532 | 421  | 0.004573 | up   |
| Gene Ontology | smooth muscle cell migration                                           | GO:0014909 | 9.19996 | 18   | 0.004679 | up   |
| Gene Ontology | actin binding                                                          | GO:0003779 | 126.116 | 157  | 0.004698 | up   |
| Gene Ontology | negative regulation of cell proliferation                              | GO:0008285 | 146.816 | 180  | 0.004737 | up   |
| Gene Ontology | cytosolic small ribosomal subunit                                      | GO:0022627 | 13.7999 | 4    | 0.004751 | down |
| Gene Ontology | cellular response to insulin stimulus                                  | GO:0032869 | 35.2665 | 52   | 0.004754 | up   |
| Gene Ontology | regulation of catalytic activity                                       | GO:0050790 | 351.898 | 402  | 0.004754 | up   |
| Gene Ontology | cell adhesion molecule binding                                         | GO:0050839 | 14.1833 | 25   | 0.004754 | up   |
| Gene Ontology | response to cytokine stimulus                                          | GO:0034097 | 41.0165 | 59   | 0.004764 | up   |
| Gene Ontology | microtubule binding                                                    | GO:0008017 | 26.4499 | 41   | 0.004852 | up   |
| Gene Ontology | proteinaceous extracellular matrix                                     | GO:0005578 | 119.983 | 150  | 0.004897 | up   |
| Gene Ontology | embryonic limb morphogenesis                                           | GO:0030326 | 34.4998 | 51   | 0.004918 | up   |
| Gene Ontology | embryonic appendage morphogenesis                                      | GO:0035113 | 34.4998 | 51   | 0.004918 | up   |
| Gene Ontology | cellular_component                                                     | GO:0005575 | 6283.19 | 6343 | 0.005033 | up   |
| Gene Ontology | mammary gland development                                              | GO:0030879 | 33.7332 | 50   | 0.005109 | up   |
| Gene Ontology | regulation of neuron apoptosis                                         | GO:0043523 | 33.7332 | 50   | 0.005109 | up   |
| Gene Ontology | T cell activation                                                      | GO:0042110 | 75.133  | 99   | 0.005144 | up   |
| Gene Ontology | regulation of protein kinase activity                                  | GO:0045859 | 145.283 | 178  | 0.005161 | up   |
| Gene Ontology | regulation of cellular component size                                  | GO:0032535 | 134.549 | 166  | 0.005336 | up   |
| Gene Ontology | actin filament bundle assembly                                         | GO:0051017 | 18.0166 | 30   | 0.005413 | up   |
| Gene Ontology | <b>regulation of canonical Wnt receptor signaling pathway</b>          | GO:0060828 | 18.0166 | 30   | 0.005413 | up   |
| Gene Ontology | regulation of cell-substrate                                           | GO:0010810 | 21.0832 | 34   | 0.005417 | up   |

|               | adhesion                                             |            |         |      |          |      |
|---------------|------------------------------------------------------|------------|---------|------|----------|------|
| Gene Ontology | primary active transmembrane transporter activity    | GO:0015399 | 43.6998 | 62   | 0.005441 | up   |
|               | P-P-bond-hydrolysis-driven                           |            |         |      |          |      |
| Gene Ontology | transmembrane transporter activity                   | GO:0015405 | 43.6998 | 62   | 0.005441 | up   |
| Gene Ontology | cellular respiration                                 | GO:0045333 | 38.3331 | 22   | 0.005583 | down |
| Gene Ontology | transcription factor binding                         | GO:0008134 | 201.249 | 239  | 0.005895 | up   |
| Gene Ontology | hemopoietic or lymphoid organ development            | GO:0048534 | 130.333 | 161  | 0.005939 | up   |
| Gene Ontology | negative regulation of metabolic process             | GO:0009892 | 340.782 | 389  | 0.006097 | up   |
| Gene Ontology | signal transducer activity                           | GO:0004871 | 815.729 | 745  | 0.006118 | down |
| Gene Ontology | molecular transducer activity                        | GO:0060089 | 815.729 | 745  | 0.006118 | down |
| Gene Ontology | regulation of nervous system development             | GO:0051960 | 91.2329 | 117  | 0.006133 | up   |
| Gene Ontology | nucleoplasm part                                     | GO:0044451 | 229.999 | 270  | 0.006216 | up   |
| Gene Ontology | extracellular matrix                                 | GO:0031012 | 142.216 | 174  | 0.006306 | up   |
| Gene Ontology | regulation of anatomical structure size              | GO:0090066 | 159.466 | 193  | 0.006372 | up   |
| Gene Ontology | multicellular organismal process                     | GO:0032501 | 1774.44 | 1870 | 0.006463 | up   |
| Gene Ontology | mitochondrial electron transport, NADH to ubiquinone | GO:0006120 | 16.4833 | 6    | 0.006473 | down |
| Gene Ontology | negative regulation of gene-specific transcription   | GO:0032582 | 34.8832 | 51   | 0.00671  | up   |
| Gene Ontology | nucleosome                                           | GO:0000786 | 24.9165 | 12   | 0.006762 | down |
| Gene Ontology | positive regulation of cellular component movement   | GO:0051272 | 53.2831 | 73   | 0.006791 | up   |
| Gene Ontology | regulation of glucose import                         | GO:0046324 | 12.2666 | 22   | 0.007069 | up   |
| Gene Ontology | lipid localization                                   | GO:0010876 | 70.533  | 93   | 0.007076 | up   |
| Gene Ontology | regulation of smooth muscle cell migration           | GO:0014910 | 8.04996 | 16   | 0.007076 | up   |
| Gene Ontology | protein tyrosine phosphatase activity                | GO:0004725 | 39.0998 | 56   | 0.007214 | up   |
| Gene Ontology | Golgi stack                                          | GO:0005795 | 39.0998 | 56   | 0.007214 | up   |
| Gene Ontology | regulation of T-helper cell differentiation          | GO:0045622 | 4.21665 | 10   | 0.007242 | up   |
| Gene Ontology | prostate glandular acinus development                | GO:0060525 | 4.21665 | 10   | 0.007242 | up   |
| Gene Ontology | lymphocyte activation                                | GO:0046649 | 108.483 | 136  | 0.007305 | up   |
| Gene Ontology | hepaticobiliary system development                   | GO:0061008 | 25.2999 | 39   | 0.007305 | up   |
| Gene Ontology | protein complex binding                              | GO:0032403 | 94.2995 | 120  | 0.007374 | up   |
| Gene Ontology | regulation of gene-specific                          | GO:0032583 | 85.4829 | 110  | 0.007374 | up   |

|               | transcription                                                                      |            |         |     |          |      |
|---------------|------------------------------------------------------------------------------------|------------|---------|-----|----------|------|
| Gene Ontology | immune system development                                                          | GO:0002520 | 139.149 | 170 | 0.007662 | up   |
| Gene Ontology | regulation of transferase activity                                                 | GO:0051338 | 156.399 | 189 | 0.0077   | up   |
| Gene Ontology | neuron migration                                                                   | GO:0001764 | 22.2332 | 35  | 0.008042 | up   |
| Gene Ontology | extracellular matrix structural constituent                                        | GO:0005201 | 31.0498 | 46  | 0.008171 | up   |
| Gene Ontology | organelle subcompartment                                                           | GO:0031984 | 31.0498 | 46  | 0.008171 | up   |
| Gene Ontology | regulation of neurogenesis                                                         | GO:0050767 | 83.9496 | 108 | 0.008244 | up   |
| Gene Ontology | cytokinesis                                                                        | GO:0000910 | 20.6999 | 33  | 0.008268 | up   |
| Gene Ontology | proximal/distal pattern formation                                                  | GO:0009954 | 8.81662 | 17  | 0.008268 | up   |
| Gene Ontology | ion transport                                                                      | GO:0006811 | 317.782 | 363 | 0.008297 | up   |
| Gene Ontology | lateral plasma membrane                                                            | GO:0016328 | 6.1333  | 13  | 0.008297 | up   |
| Gene Ontology | prostate gland development                                                         | GO:0030850 | 16.0999 | 27  | 0.008297 | up   |
| Gene Ontology | hippo signaling cascade                                                            | GO:0035329 | 6.1333  | 13  | 0.008297 | up   |
| Gene Ontology | SH3/SH2 adaptor activity                                                           | GO:0005070 | 19.1666 | 31  | 0.008376 | up   |
| Gene Ontology | coated pit                                                                         | GO:0005905 | 18.3999 | 30  | 0.008376 | up   |
| Gene Ontology | hemopoiesis                                                                        | GO:0030097 | 122.283 | 151 | 0.008376 | up   |
| Gene Ontology | Golgi cisterna                                                                     | GO:0031985 | 30.2832 | 45  | 0.008376 | up   |
| Gene Ontology | appendage development                                                              | GO:0048736 | 41.0165 | 58  | 0.00851  | up   |
| Gene Ontology | limb development                                                                   | GO:0060173 | 41.0165 | 58  | 0.00851  | up   |
| Gene Ontology | phosphatase activity                                                               | GO:0016791 | 97.3662 | 123 | 0.008741 | up   |
| Gene Ontology | clathrin-coated vesicle                                                            | GO:0030136 | 56.3497 | 76  | 0.009089 | up   |
| Gene Ontology | development of primary sexual characteristics                                      | GO:0045137 | 56.3497 | 76  | 0.009089 | up   |
| Gene Ontology | cell projection membrane                                                           | GO:0031253 | 44.4664 | 62  | 0.00913  | up   |
| Gene Ontology | gastrulation with mouth forming second                                             | GO:0001702 | 9.58329 | 18  | 0.00928  | up   |
| Gene Ontology | oxidative phosphorylation                                                          | GO:0006119 | 39.8665 | 24  | 0.009382 | down |
| Gene Ontology | pyrophosphatase activity                                                           | GO:0016462 | 292.099 | 335 | 0.009382 | up   |
| Gene Ontology | subs synaptic reticulum                                                            | GO:0071212 | 277.149 | 319 | 0.009382 | up   |
| Gene Ontology | positive regulation of binding                                                     | GO:0051099 | 43.6998 | 61  | 0.009581 | up   |
| Gene Ontology | axon part                                                                          | GO:0033267 | 27.2165 | 41  | 0.009667 | up   |
| Gene Ontology | positive regulation of transcription factor activity                               | GO:0051091 | 33.7332 | 49  | 0.009681 | up   |
| Gene Ontology | hydrolase activity, acting on acid anhydrides, in phosphorus-containing anhydrides | GO:0016818 | 293.249 | 336 | 0.009864 | up   |
| Gene Ontology | Rho protein signal transduction                                                    | GO:0007266 | 47.1498 | 65  | 0.010054 | up   |
| Gene Ontology | extracellular matrix part                                                          | GO:0044420 | 42.9331 | 60  | 0.010054 | up   |
| Gene Ontology | negative regulation of cell differentiation                                        | GO:0045596 | 92.3829 | 117 | 0.010114 | up   |
| Gene Ontology | central nervous system neuron development                                          | GO:0021954 | 10.3499 | 19  | 0.010164 | up   |

|               |                                                                |            |         |     |          |      |
|---------------|----------------------------------------------------------------|------------|---------|-----|----------|------|
| Gene Ontology | cytosolic part                                                 | GO:0044445 | 56.7331 | 38  | 0.010407 | down |
|               | positive regulation of                                         |            |         |     |          |      |
| Gene Ontology | gene-specific transcription from<br>RNA polymerase II promoter | GO:0010552 | 42.1665 | 59  | 0.01055  | up   |
| Gene Ontology | small molecule metabolic process                               | GO:0044281 | 650.897 | 712 | 0.01055  | up   |
| Gene Ontology | liver development                                              | GO:0001889 | 24.9165 | 38  | 0.010626 | up   |
| Gene Ontology | nucleoside phosphate metabolic<br>process                      | GO:0006753 | 213.516 | 250 | 0.010688 | up   |
| Gene Ontology | nucleotide metabolic process                                   | GO:0009117 | 213.516 | 250 | 0.010688 | up   |
| Gene Ontology | lymphocyte activation involved in<br>immune response           | GO:0002285 | 11.1166 | 20  | 0.010861 | up   |
| Gene Ontology | positive regulation of cell<br>proliferation                   | GO:0008284 | 176.716 | 210 | 0.010861 | up   |
| Gene Ontology | negative regulation of phosphorus<br>metabolic process         | GO:0010563 | 24.1499 | 37  | 0.010861 | up   |
| Gene Ontology | symporter activity                                             | GO:0015293 | 49.8331 | 68  | 0.010861 | up   |
| Gene Ontology | negative regulation of phosphate<br>metabolic process          | GO:0045936 | 24.1499 | 37  | 0.010861 | up   |
| Gene Ontology | GTPase activator activity                                      | GO:0005096 | 88.1662 | 112 | 0.011019 | up   |
| Gene Ontology | receptor signaling protein<br>serine/threonine kinase activity | GO:0004702 | 23.3832 | 36  | 0.011183 | up   |
| Gene Ontology | hydrolase activity, acting on acid<br>anhydrides               | GO:0016817 | 294.782 | 337 | 0.011245 | up   |
| Gene Ontology | neuronal cell body                                             | GO:0043025 | 69.7663 | 91  | 0.011352 | up   |
| Gene Ontology | cell body                                                      | GO:0044297 | 69.7663 | 91  | 0.011352 | up   |
| Gene Ontology | central nervous system neuron<br>axonogenesis                  | GO:0021955 | 4.98331 | 11  | 0.011437 | up   |
| Gene Ontology | cortical cytoskeleton organization                             | GO:0030865 | 4.98331 | 11  | 0.011437 | up   |
| Gene Ontology | cortical actin cytoskeleton<br>organization                    | GO:0030866 | 4.98331 | 11  | 0.011437 | up   |
| Gene Ontology | eye development                                                | GO:0001654 | 59.4164 | 79  | 0.011768 | up   |
| Gene Ontology | protein N-terminus binding                                     | GO:0047485 | 29.8999 | 44  | 0.01178  | up   |
| Gene Ontology | cofactor catabolic process                                     | GO:0051187 | 12.6499 | 4   | 0.011824 | down |
| Gene Ontology | filopodium                                                     | GO:0030175 | 12.6499 | 22  | 0.011938 | up   |
| Gene Ontology | ATPase activity, coupled to<br>movement of substances          | GO:0043492 | 39.8665 | 56  | 0.012015 | up   |
| Gene Ontology | negative regulation of ligase<br>activity                      | GO:0051352 | 25.2999 | 13  | 0.012015 | down |
| Gene Ontology | negative regulation of<br>ubiquitin-protein ligase activity    | GO:0051444 | 25.2999 | 13  | 0.012015 | down |
| Gene Ontology | ovulation cycle process                                        | GO:0022602 | 29.1332 | 43  | 0.012191 | up   |
| Gene Ontology | regulation of endocytosis                                      | GO:0030100 | 29.1332 | 43  | 0.012191 | up   |
| Gene Ontology | collagen                                                       | GO:0005581 | 13.4166 | 23  | 0.012255 | up   |
| Gene Ontology | response to bacterium                                          | GO:0009617 | 91.2329 | 68  | 0.012402 | down |

|               |                                                                                |            |         |     |          |      |
|---------------|--------------------------------------------------------------------------------|------------|---------|-----|----------|------|
| Gene Ontology | SNAP receptor activity                                                         | GO:0005484 | 7.66663 | 15  | 0.012435 | up   |
| Gene Ontology | RNA splicing                                                                   | GO:0008380 | 114.999 | 89  | 0.01254  | down |
| Gene Ontology | appendage morphogenesis                                                        | GO:0035107 | 39.0998 | 55  | 0.01254  | up   |
| Gene Ontology | limb morphogenesis                                                             | GO:0035108 | 39.0998 | 55  | 0.01254  | up   |
| Gene Ontology | presynaptic membrane                                                           | GO:0042734 | 14.9499 | 25  | 0.012565 | up   |
| Gene Ontology | dendritic spine                                                                | GO:0043197 | 18.0166 | 29  | 0.012565 | up   |
| Gene Ontology | neuron spine                                                                   | GO:0044309 | 18.0166 | 29  | 0.012565 | up   |
| Gene Ontology | recycling endosome                                                             | GO:0055037 | 14.9499 | 25  | 0.012565 | up   |
| Gene Ontology | positive regulation of transcription<br>regulator activity                     | GO:0090047 | 34.1165 | 49  | 0.012565 | up   |
| Gene Ontology | vasculogenesis                                                                 | GO:0001570 | 16.4833 | 27  | 0.012656 | up   |
| Gene Ontology | sarcoplasmic reticulum                                                         | GO:0016529 | 16.4833 | 27  | 0.012656 | up   |
| Gene Ontology | intrinsic to organelle membrane                                                | GO:0031300 | 57.8831 | 77  | 0.012817 | up   |
| Gene Ontology | regulation of cellular protein<br>metabolic process                            | GO:0032268 | 220.799 | 257 | 0.01289  | up   |
| Gene Ontology | protein amino acid glycosylation                                               | GO:0006486 | 46.7664 | 64  | 0.012938 | up   |
| Gene Ontology | multicellular organism growth                                                  | GO:0035264 | 27.5999 | 41  | 0.012938 | up   |
| Gene Ontology | macromolecule glycosylation                                                    | GO:0043413 | 46.7664 | 64  | 0.012938 | up   |
| Gene Ontology | glycosylation                                                                  | GO:0070085 | 46.7664 | 64  | 0.012938 | up   |
| Gene Ontology | neuron death                                                                   | GO:0070997 | 38.3331 | 54  | 0.012956 | up   |
| Gene Ontology | transmembrane receptor protein<br>serine/threonine kinase signaling<br>pathway | GO:0007178 | 64.0164 | 84  | 0.013191 | up   |
| Gene Ontology | positive regulation of programmed<br>cell death                                | GO:0043068 | 179.399 | 212 | 0.013594 | up   |
| Gene Ontology | <b>cell-cell adhesion</b>                                                      | GO:0016337 | 121.899 | 149 | 0.0136   | up   |
| Gene Ontology | positive regulation of DNA binding                                             | GO:0043388 | 37.5665 | 53  | 0.0136   | up   |
| Gene Ontology | neuron apoptosis                                                               | GO:0051402 | 37.5665 | 53  | 0.0136   | up   |
| Gene Ontology | positive regulation of cell death                                              | GO:0010942 | 181.316 | 214 | 0.013855 | up   |
| Gene Ontology | integral to organelle membrane                                                 | GO:0031301 | 49.4498 | 67  | 0.013947 | up   |
| Gene Ontology | regulation of cell projection<br>assembly                                      | GO:0060491 | 8.43329 | 16  | 0.013956 | up   |
| Gene Ontology | nucleoplasm                                                                    | GO:0005654 | 359.948 | 405 | 0.014029 | up   |
| Gene Ontology | 3',5'-cyclic-AMP<br>phosphodiesterase activity                                 | GO:0004115 | 3.83331 | 9   | 0.014438 | up   |
| Gene Ontology | asymmetric protein localization                                                | GO:0008105 | 3.83331 | 9   | 0.014438 | up   |
| Gene Ontology | Cul3-RING ubiquitin ligase<br>complex                                          | GO:0031463 | 3.83331 | 9   | 0.014438 | up   |
| Gene Ontology | I-SMAD binding                                                                 | GO:0070411 | 3.83331 | 9   | 0.014438 | up   |
| Gene Ontology | regulation of growth                                                           | GO:0040008 | 142.983 | 172 | 0.01452  | up   |
| Gene Ontology | coated vesicle                                                                 | GO:0030135 | 68.6163 | 89  | 0.01478  | up   |
| Gene Ontology | positive regulation of protein<br>ubiquitination                               | GO:0031398 | 36.4165 | 22  | 0.01478  | down |
| Gene Ontology | cation channel complex                                                         | GO:0034703 | 52.1331 | 70  | 0.014802 | up   |



|               |                                                                                                |            |         |     |          |      |
|---------------|------------------------------------------------------------------------------------------------|------------|---------|-----|----------|------|
| Gene Ontology | integrin binding                                                                               | GO:0005178 | 24.5332 | 37  | 0.014831 | up   |
| Gene Ontology | positive regulation of microtubule polymerization                                              | GO:0031116 | 2.68332 | 7   | 0.014867 | up   |
| Gene Ontology | nucleobase, nucleoside and nucleotide metabolic process                                        | GO:0055086 | 222.332 | 258 | 0.014889 | up   |
| Gene Ontology | CD4-positive, alpha-beta T cell differentiation involved in immune response                    | GO:0002294 | 5.74997 | 12  | 0.015028 | up   |
| Gene Ontology | phospholipid-translocating ATPase activity                                                     | GO:0004012 | 5.74997 | 12  | 0.015028 | up   |
| Gene Ontology | hydrolase activity, acting on acid anhydrides, catalyzing transmembrane movement of substances | GO:0016820 | 40.2498 | 56  | 0.015028 | up   |
| Gene Ontology | T-helper cell differentiation                                                                  | GO:0042093 | 5.74997 | 12  | 0.015028 | up   |
| Gene Ontology | glycosphingolipid metabolic process                                                            | GO:0006687 | 9.19996 | 17  | 0.015283 | up   |
| Gene Ontology | receptor binding                                                                               | GO:0005102 | 355.732 | 400 | 0.015413 | up   |
| Gene Ontology | positive regulation of kinase activity                                                         | GO:0033674 | 96.2162 | 120 | 0.015659 | up   |
| Gene Ontology | ATPase activity, coupled to transmembrane movement of substances                               | GO:0042626 | 39.4831 | 55  | 0.015811 | up   |
| Gene Ontology | positive regulation of apoptosis                                                               | GO:0043065 | 178.249 | 210 | 0.016465 | up   |
| Gene Ontology | response to stress                                                                             | GO:0006950 | 730.246 | 791 | 0.016587 | up   |
| Gene Ontology | intracellular protein transport                                                                | GO:0006886 | 168.283 | 199 | 0.017349 | up   |
| Gene Ontology | insulin receptor signaling pathway                                                             | GO:0008286 | 20.6999 | 32  | 0.017349 | up   |
| Gene Ontology | stress fiber                                                                                   | GO:0001725 | 10.7333 | 19  | 0.017608 | up   |
| Gene Ontology | amine transmembrane transporter activity                                                       | GO:0005275 | 27.9832 | 41  | 0.017608 | up   |
| Gene Ontology | striated muscle tissue development                                                             | GO:0014706 | 62.8664 | 82  | 0.017748 | up   |
| Gene Ontology | positive regulation of ubiquitin-protein ligase activity                                       | GO:0051443 | 27.2165 | 15  | 0.017751 | down |
| Gene Ontology | glycogen metabolic process                                                                     | GO:0005977 | 19.1666 | 30  | 0.018222 | up   |
| Gene Ontology | potassium ion transport                                                                        | GO:0006813 | 52.5164 | 70  | 0.018344 | up   |
| Gene Ontology | regulation of BMP signaling pathway                                                            | GO:0030510 | 11.4999 | 20  | 0.018344 | up   |
| Gene Ontology | response to insulin stimulus                                                                   | GO:0032868 | 52.5164 | 70  | 0.018344 | up   |
| Gene Ontology | leukocyte differentiation                                                                      | GO:0002521 | 74.3663 | 95  | 0.018411 | up   |
| Gene Ontology | axon guidance                                                                                  | GO:0007411 | 37.1832 | 52  | 0.018411 | up   |
| Gene Ontology | lipid transport                                                                                | GO:0006869 | 62.0997 | 81  | 0.018654 | up   |
| Gene Ontology | translation                                                                                    | GO:0006412 | 157.933 | 129 | 0.018749 | down |
| Gene Ontology | developmental pigmentation                                                                     | GO:0048066 | 12.2666 | 21  | 0.018806 | up   |

|               |                                                              |            |         |     |          |      |
|---------------|--------------------------------------------------------------|------------|---------|-----|----------|------|
| Gene Ontology | cytosol                                                      | GO:0005829 | 507.148 | 558 | 0.018888 | up   |
| Gene Ontology | histone deacetylase complex                                  | GO:0000118 | 16.8666 | 27  | 0.018889 | up   |
| Gene Ontology | negative regulation of protein<br>amino acid phosphorylation | GO:0001933 | 16.8666 | 27  | 0.018889 | up   |
| Gene Ontology | sarcoplasm                                                   | GO:0016528 | 16.8666 | 27  | 0.018889 | up   |
| Gene Ontology | Golgi cisterna membrane                                      | GO:0032580 | 26.4499 | 39  | 0.018889 | up   |
| Gene Ontology | ATP synthesis coupled electron<br>transport                  | GO:0042773 | 21.8499 | 11  | 0.018889 | down |
| Gene Ontology | mitochondrial ATP synthesis<br>coupled electron transport    | GO:0042775 | 21.8499 | 11  | 0.018889 | down |
| Gene Ontology | positive regulation of ligase<br>activity                    | GO:0051351 | 28.3665 | 16  | 0.018889 | down |
| Gene Ontology | regulation of response to stress                             | GO:0080134 | 126.499 | 153 | 0.018889 | up   |
| Gene Ontology | cartilage development                                        | GO:0051216 | 36.4165 | 51  | 0.019116 | up   |
| Gene Ontology | killing of cells of another organism                         | GO:0031640 | 8.81662 | 2   | 0.019255 | down |
| Gene Ontology | transporter activity                                         | GO:0005215 | 450.031 | 498 | 0.019292 | up   |
| Gene Ontology | regulation of intracellular protein<br>kinase cascade        | GO:0010627 | 128.416 | 155 | 0.019324 | up   |
| Gene Ontology | induction of programmed cell<br>death                        | GO:0012502 | 128.416 | 155 | 0.019324 | up   |
| Gene Ontology | cellular component assembly                                  | GO:0022607 | 398.665 | 444 | 0.019355 | up   |
| Gene Ontology | positive regulation of cell<br>projection organization       | GO:0031346 | 25.6832 | 38  | 0.019465 | up   |
| Gene Ontology | melanosome                                                   | GO:0042470 | 35.6498 | 50  | 0.019944 | up   |
| Gene Ontology | cellular lipid metabolic process                             | GO:0044255 | 225.399 | 260 | 0.019944 | up   |
| Gene Ontology | pigment granule                                              | GO:0048770 | 35.6498 | 50  | 0.019944 | up   |
| Gene Ontology | negative regulation of<br>developmental process              | GO:0051093 | 113.083 | 138 | 0.019944 | up   |
| Gene Ontology | ion transmembrane transporter<br>activity                    | GO:0015075 | 274.082 | 312 | 0.019951 | up   |
| Gene Ontology | peptidase inhibitor activity                                 | GO:0030414 | 60.9497 | 43  | 0.019961 | down |
| Gene Ontology | myeloid cell differentiation                                 | GO:0030099 | 60.5664 | 79  | 0.020336 | up   |
| Gene Ontology | positive regulation of molecular<br>function                 | GO:0044093 | 249.932 | 286 | 0.021101 | up   |
| Gene Ontology | regulation of protein metabolic<br>process                   | GO:0051246 | 249.932 | 286 | 0.021101 | up   |
| Gene Ontology | sex determination                                            | GO:0007530 | 7.2833  | 14  | 0.021374 | up   |
| Gene Ontology | melanocyte differentiation                                   | GO:0030318 | 7.2833  | 14  | 0.021374 | up   |
| Gene Ontology | regulation of developmental<br>pigmentation                  | GO:0048070 | 4.59998 | 10  | 0.021571 | up   |
| Gene Ontology | positive regulation of<br>gene-specific transcription        | GO:0043193 | 56.3497 | 74  | 0.02192  | up   |
| Gene Ontology | small GTPase regulator activity                              | GO:0005083 | 111.549 | 136 | 0.022001 | up   |
| Gene Ontology | gastrulation                                                 | GO:0007369 | 34.1165 | 48  | 0.022008 | up   |

|               |                                                                                       |            |         |     |          |      |
|---------------|---------------------------------------------------------------------------------------|------------|---------|-----|----------|------|
| Gene Ontology | embryonic organ morphogenesis                                                         | GO:0048562 | 52.8997 | 70  | 0.022124 | up   |
| Gene Ontology | regulation of cell shape                                                              | GO:0008360 | 22.6166 | 34  | 0.022573 | up   |
| Gene Ontology | amino acid transmembrane transporter activity                                         | GO:0015171 | 22.6166 | 34  | 0.022573 | up   |
| Gene Ontology | protein heterooligomerization                                                         | GO:0051291 | 22.6166 | 34  | 0.022573 | up   |
| Gene Ontology | transmembrane transport                                                               | GO:0055085 | 233.449 | 268 | 0.022925 | up   |
| Gene Ontology | induction of apoptosis                                                                | GO:0006917 | 128.033 | 154 | 0.022929 | up   |
| Gene Ontology | solute:cation symporter activity                                                      | GO:0015294 | 33.3498 | 47  | 0.023029 | up   |
| Gene Ontology | female sex differentiation                                                            | GO:0046660 | 33.3498 | 47  | 0.023029 | up   |
| Gene Ontology | regulation of myeloid cell differentiation                                            | GO:0045637 | 28.3665 | 41  | 0.023099 | up   |
| Gene Ontology | chemical homeostasis                                                                  | GO:0048878 | 215.816 | 249 | 0.023437 | up   |
| Gene Ontology | protein dimerization activity                                                         | GO:0046983 | 226.166 | 260 | 0.023992 | up   |
| Gene Ontology | ATPase activity, coupled to transmembrane movement of ions, phosphorylative mechanism | GO:0015662 | 20.3166 | 31  | 0.025113 | up   |
| Gene Ontology | cellular glucan metabolic process                                                     | GO:0006073 | 19.5499 | 30  | 0.02587  | up   |
| Gene Ontology | carbohydrate transport                                                                | GO:0008643 | 36.0332 | 50  | 0.02587  | up   |
| Gene Ontology | synaptosome                                                                           | GO:0019717 | 36.0332 | 50  | 0.02587  | up   |
| Gene Ontology | glucan metabolic process                                                              | GO:0044042 | 19.5499 | 30  | 0.02587  | up   |
| Gene Ontology | head development                                                                      | GO:0060322 | 8.81662 | 16  | 0.02587  | up   |
| Gene Ontology | fertilization                                                                         | GO:0009566 | 30.2832 | 18  | 0.026373 | down |
| Gene Ontology | cell cortex part                                                                      | GO:0044448 | 26.0665 | 38  | 0.026577 | up   |
| Gene Ontology | negative regulation of neuron apoptosis                                               | GO:0043524 | 18.7832 | 29  | 0.02661  | up   |
| Gene Ontology | extracellular matrix organization                                                     | GO:0030198 | 39.4831 | 54  | 0.02681  | up   |
| Gene Ontology | proton-transporting ATP synthase complex                                              | GO:0045259 | 8.43329 | 2   | 0.026966 | down |
| Gene Ontology | positive regulation of locomotion                                                     | GO:0040017 | 53.2831 | 70  | 0.027156 | up   |
| Gene Ontology | cofactor biosynthetic process                                                         | GO:0051188 | 42.9331 | 58  | 0.027345 | up   |
| Gene Ontology | digestive tract morphogenesis                                                         | GO:0048546 | 9.58329 | 17  | 0.027352 | up   |
| Gene Ontology | positive regulation of cell migration                                                 | GO:0030335 | 49.8331 | 66  | 0.027405 | up   |
| Gene Ontology | protein serine/threonine phosphatase activity                                         | GO:0004722 | 17.2499 | 27  | 0.027961 | up   |
| Gene Ontology | response to carbohydrate stimulus                                                     | GO:0009743 | 30.2832 | 43  | 0.028065 | up   |
| Gene Ontology | paraxial mesoderm development                                                         | GO:0048339 | 5.36664 | 11  | 0.028065 | up   |
| Gene Ontology | lipid modification                                                                    | GO:0030258 | 38.7165 | 53  | 0.028129 | up   |
| Gene Ontology | cation transmembrane transporter activity                                             | GO:0008324 | 210.066 | 242 | 0.028325 | up   |
| Gene Ontology | nerve development                                                                     | GO:0021675 | 10.3499 | 18  | 0.028325 | up   |
| Gene Ontology | cellular monovalent inorganic cation homeostasis                                      | GO:0030004 | 10.3499 | 18  | 0.028325 | up   |
| Gene Ontology | synaptic vesicle membrane                                                             | GO:0030672 | 16.4833 | 26  | 0.028325 | up   |
| Gene Ontology | regulation of Ras protein signal                                                      | GO:0046578 | 89.6996 | 111 | 0.028325 | up   |

|               |                                                    |            |         |     |          |      |
|---------------|----------------------------------------------------|------------|---------|-----|----------|------|
|               | transduction                                       |            |         |     |          |      |
| Gene Ontology | protein amino acid autophosphorylation             | GO:0046777 | 34.4998 | 48  | 0.028325 | up   |
| Gene Ontology | nuclear lumen                                      | GO:0031981 | 581.897 | 633 | 0.028608 | up   |
| Gene Ontology | digestive system development                       | GO:0055123 | 24.5332 | 36  | 0.028608 | up   |
| Gene Ontology | regulation of protein localization                 | GO:0032880 | 67.4663 | 86  | 0.028852 | up   |
| Gene Ontology | mitochondrial membrane organization                | GO:0007006 | 11.1166 | 19  | 0.02897  | up   |
| Gene Ontology | foregut morphogenesis                              | GO:0007440 | 3.44998 | 8   | 0.028975 | up   |
| Gene Ontology | coenzyme biosynthetic process                      | GO:0009108 | 29.5165 | 42  | 0.028975 | up   |
| Gene Ontology | cyclic nucleotide catabolic process                | GO:0009214 | 3.44998 | 8   | 0.028975 | up   |
| Gene Ontology | fucose catabolic process                           | GO:0019317 | 3.44998 | 8   | 0.028975 | up   |
| Gene Ontology | L-fucose catabolic process                         | GO:0042355 | 3.44998 | 8   | 0.028975 | up   |
| Gene Ontology | regulation of cytoskeleton organization            | GO:0051493 | 55.1997 | 72  | 0.029167 | up   |
| Gene Ontology | regulation of cyclase activity                     | GO:0031279 | 37.9498 | 52  | 0.029186 | up   |
| Gene Ontology | regulation of cell-matrix adhesion                 | GO:0001952 | 13.4166 | 22  | 0.029192 | up   |
| Gene Ontology | insulin receptor binding                           | GO:0005158 | 11.8833 | 20  | 0.029192 | up   |
| Gene Ontology | protein amino acid N-linked glycosylation          | GO:0006487 | 13.4166 | 22  | 0.029192 | up   |
| Gene Ontology | regulation of glucose transport                    | GO:0010827 | 13.4166 | 22  | 0.029192 | up   |
| Gene Ontology | actomyosin                                         | GO:0042641 | 12.6499 | 21  | 0.029192 | up   |
| Gene Ontology | regulation of fatty acid oxidation                 | GO:0046320 | 12.6499 | 21  | 0.029192 | up   |
| Gene Ontology | synaptic vesicle transport                         | GO:0048489 | 12.6499 | 21  | 0.029192 | up   |
| Gene Ontology | phosphoprotein binding                             | GO:0051219 | 12.6499 | 21  | 0.029192 | up   |
| Gene Ontology | regulation of immune system process                | GO:0002682 | 162.916 | 191 | 0.029463 | up   |
| Gene Ontology | regulation of protein modification process         | GO:0031399 | 144.516 | 171 | 0.029792 | up   |
| Gene Ontology | response to estrogen stimulus                      | GO:0043627 | 44.8498 | 60  | 0.029792 | up   |
| Gene Ontology | respiratory electron transport chain               | GO:0022904 | 24.9165 | 14  | 0.03036  | down |
| Gene Ontology | voltage-gated potassium channel activity           | GO:0005249 | 37.1832 | 51  | 0.030466 | up   |
| Gene Ontology | Ras guanyl-nucleotide exchange factor activity     | GO:0005088 | 32.9665 | 46  | 0.030719 | up   |
| Gene Ontology | protein oligomerization                            | GO:0051259 | 74.7496 | 94  | 0.030719 | up   |
| Gene Ontology | energy reserve metabolic process                   | GO:0006112 | 22.2332 | 33  | 0.031866 | up   |
| Gene Ontology | T cell cytokine production                         | GO:0002369 | 2.29999 | 6   | 0.031969 | up   |
| Gene Ontology | NF-kappaB-inducing kinase activity                 | GO:0004704 | 2.29999 | 6   | 0.031969 | up   |
| Gene Ontology | FACIT collagen                                     | GO:0005593 | 2.29999 | 6   | 0.031969 | up   |
| Gene Ontology | protein serine/threonine kinase activator activity | GO:0043539 | 2.29999 | 6   | 0.031969 | up   |

|               |                                                                                           |            |         |     |          |      |
|---------------|-------------------------------------------------------------------------------------------|------------|---------|-----|----------|------|
| Gene Ontology | regulation of T-helper 2 cell differentiation                                             | GO:0045628 | 2.29999 | 6   | 0.031969 | up   |
| Gene Ontology | positive regulation of protein kinase activity                                            | GO:0045860 | 92.7662 | 114 | 0.031969 | up   |
| Gene Ontology | positive regulation of focal adhesion assembly                                            | GO:0051894 | 2.29999 | 6   | 0.031969 | up   |
| Gene Ontology | prostate glandular acinus morphogenesis                                                   | GO:0060526 | 2.29999 | 6   | 0.031969 | up   |
| Gene Ontology | prostate epithelial cord arborization involved in prostate glandular acinus morphogenesis | GO:0060527 | 2.29999 | 6   | 0.031969 | up   |
| Gene Ontology | cellular response to transforming growth factor beta stimulus                             | GO:0071560 | 2.29999 | 6   | 0.031969 | up   |
| Gene Ontology | RNA splicing, via transesterification reactions with bulged adenosine as nucleophile      | GO:0000377 | 37.1832 | 24  | 0.03209  | down |
| Gene Ontology | nuclear mRNA splicing, via spliceosome                                                    | GO:0000398 | 37.1832 | 24  | 0.03209  | down |
| Gene Ontology | alpha-beta T cell activation involved in immune response                                  | GO:0002287 | 6.1333  | 12  | 0.03209  | up   |
| Gene Ontology | T cell differentiation involved in immune response                                        | GO:0002292 | 6.1333  | 12  | 0.03209  | up   |
| Gene Ontology | alpha-beta T cell differentiation involved in immune response                             | GO:0002293 | 6.1333  | 12  | 0.03209  | up   |
| Gene Ontology | <b>cell-cell junction</b>                                                                 | GO:0005911 | 76.6663 | 96  | 0.03209  | up   |
| Gene Ontology | regulation of glycogen biosynthetic process                                               | GO:0005979 | 6.1333  | 12  | 0.03209  | up   |
| Gene Ontology | regulation of glucan biosynthetic process                                                 | GO:0010962 | 6.1333  | 12  | 0.03209  | up   |
| Gene Ontology | regulation of polysaccharide biosynthetic process                                         | GO:0032885 | 6.1333  | 12  | 0.03209  | up   |
| Gene Ontology | myelin sheath                                                                             | GO:0043209 | 6.1333  | 12  | 0.03209  | up   |
| Gene Ontology | regulation of response to stimulus                                                        | GO:0048583 | 208.916 | 240 | 0.032594 | up   |
| Gene Ontology | leukocyte activation                                                                      | GO:0045321 | 131.099 | 156 | 0.032636 | up   |
| Gene Ontology | protein kinase binding                                                                    | GO:0019901 | 67.8497 | 86  | 0.033062 | up   |
| Gene Ontology | development of primary female sexual characteristics                                      | GO:0046545 | 31.4332 | 44  | 0.033343 | up   |
| Gene Ontology | eye morphogenesis                                                                         | GO:0048592 | 31.4332 | 44  | 0.033343 | up   |
| Gene Ontology | cation transport                                                                          | GO:0006812 | 225.016 | 257 | 0.034174 | up   |
| Gene Ontology | cysteine-type peptidase activity                                                          | GO:0008234 | 55.5831 | 72  | 0.034344 | up   |
| Gene Ontology | late endosome                                                                             | GO:0005770 | 42.5498 | 57  | 0.034393 | up   |
| Gene Ontology | RNA splicing, via transesterification reactions                                           | GO:0000375 | 40.6331 | 27  | 0.034706 | down |
| Gene Ontology | caveola                                                                                   | GO:0005901 | 19.9332 | 30  | 0.034945 | up   |

|               |                                                                                              |            |         |     |          |      |
|---------------|----------------------------------------------------------------------------------------------|------------|---------|-----|----------|------|
| Gene Ontology | positive regulation of organelle organization                                                | GO:0010638 | 34.8832 | 48  | 0.034945 | up   |
| Gene Ontology | sphingolipid metabolic process                                                               | GO:0006665 | 30.6665 | 43  | 0.035036 | up   |
| Gene Ontology | small conjugating protein ligase activity                                                    | GO:0019787 | 80.4996 | 100 | 0.035397 | up   |
| Gene Ontology | negative regulation of gene-specific transcription from RNA polymerase II promoter           | GO:0010553 | 25.6832 | 37  | 0.035509 | up   |
| Gene Ontology | viral infectious cycle                                                                       | GO:0019058 | 25.6832 | 37  | 0.035509 | up   |
| Gene Ontology | developmental maturation                                                                     | GO:0021700 | 38.3331 | 52  | 0.035796 | up   |
| Gene Ontology | threonine-type endopeptidase activity                                                        | GO:0004298 | 8.04996 | 2   | 0.035942 | down |
| Gene Ontology | threonine-type peptidase activity                                                            | GO:0070003 | 8.04996 | 2   | 0.035942 | down |
| Gene Ontology | actin cytoskeleton                                                                           | GO:0015629 | 107.716 | 130 | 0.036763 | up   |
| Gene Ontology | large ribosomal subunit                                                                      | GO:0015934 | 24.5332 | 14  | 0.036906 | down |
| Gene Ontology | regulation of neuron differentiation                                                         | GO:0045664 | 68.9997 | 87  | 0.036913 | up   |
| Gene Ontology | transcription coactivator activity                                                           | GO:0003713 | 82.4163 | 102 | 0.037018 | up   |
| Gene Ontology | response to estradiol stimulus                                                               | GO:0032355 | 24.9165 | 36  | 0.037025 | up   |
| Gene Ontology | steroid dehydrogenase activity, acting on the CH-OH group of donors, NAD or NADP as acceptor | GO:0033764 | 9.58329 | 3   | 0.037025 | down |
| Gene Ontology | cell junction assembly                                                                       | GO:0034329 | 24.9165 | 36  | 0.037025 | up   |
| Gene Ontology | intrinsic to Golgi membrane                                                                  | GO:0031228 | 18.3999 | 28  | 0.037174 | up   |
| Gene Ontology | vacuole                                                                                      | GO:0005773 | 109.633 | 132 | 0.037777 | up   |
| Gene Ontology | endoplasmic reticulum part                                                                   | GO:0044432 | 264.115 | 298 | 0.038315 | up   |
| Gene Ontology | voltage-gated potassium channel complex                                                      | GO:0008076 | 33.3498 | 46  | 0.038509 | up   |
| Gene Ontology | potassium channel complex                                                                    | GO:0034705 | 33.3498 | 46  | 0.038509 | up   |
| Gene Ontology | response to glucose stimulus                                                                 | GO:0009749 | 24.1499 | 35  | 0.038657 | up   |
| Gene Ontology | growth cone                                                                                  | GO:0030426 | 24.1499 | 35  | 0.038657 | up   |
| Gene Ontology | cell cortex                                                                                  | GO:0005938 | 50.5998 | 66  | 0.038798 | up   |
| Gene Ontology | pigment cell differentiation                                                                 | GO:0050931 | 7.66663 | 14  | 0.038998 | up   |
| Gene Ontology | protein-DNA complex                                                                          | GO:0032993 | 37.9498 | 25  | 0.039068 | down |
| Gene Ontology | columnar/cuboidal epithelial cell differentiation                                            | GO:0002065 | 4.21665 | 9   | 0.039863 | up   |
| Gene Ontology | fibrillar collagen                                                                           | GO:0005583 | 4.21665 | 9   | 0.039863 | up   |
| Gene Ontology | respiratory tube development                                                                 | GO:0030323 | 40.2498 | 54  | 0.039863 | up   |
| Gene Ontology | actinin binding                                                                              | GO:0042805 | 4.21665 | 9   | 0.039863 | up   |
| Gene Ontology | protein phosphatase 2A binding                                                               | GO:0051721 | 4.21665 | 9   | 0.039863 | up   |
| Gene Ontology | regulation of cell growth                                                                    | GO:0001558 | 83.5663 | 103 | 0.040478 | up   |
| Gene Ontology | regulation of binding                                                                        | GO:0051098 | 80.8829 | 100 | 0.040698 | up   |
| Gene Ontology | gonad development                                                                            | GO:0008406 | 49.8331 | 65  | 0.040817 | up   |
| Gene Ontology | positive regulation of                                                                       | GO:0002053 | 8.43329 | 15  | 0.041027 | up   |

|               |                                                                |            |         |     |          |      |
|---------------|----------------------------------------------------------------|------------|---------|-----|----------|------|
|               | mesenchymal cell proliferation                                 |            |         |     |          |      |
| Gene Ontology | lipid biosynthetic process                                     | GO:0008610 | 147.583 | 173 | 0.041027 | up   |
| Gene Ontology | positive regulation of Wnt receptor signaling pathway          | GO:0030177 | 8.43329 | 15  | 0.041027 | up   |
| Gene Ontology | cadherin binding                                               | GO:0045296 | 8.43329 | 15  | 0.041027 | up   |
| Gene Ontology | platelet-derived growth factor receptor signaling pathway      | GO:0048008 | 8.43329 | 15  | 0.041027 | up   |
| Gene Ontology | cell-substrate junction assembly                               | GO:0007044 | 15.3333 | 24  | 0.041381 | up   |
| Gene Ontology | negative regulation of phosphorylation                         | GO:0042326 | 22.6166 | 33  | 0.041897 | up   |
| Gene Ontology | positive regulation of NF-kappaB transcription factor activity | GO:0051092 | 22.6166 | 33  | 0.041897 | up   |
| Gene Ontology | cortical cytoskeleton                                          | GO:0030863 | 14.5666 | 23  | 0.042277 | up   |
| Gene Ontology | ovulation cycle                                                | GO:0042698 | 31.8165 | 44  | 0.042277 | up   |
| Gene Ontology | regulation of mesenchymal cell proliferation                   | GO:0010464 | 9.19996 | 16  | 0.042544 | up   |
| Gene Ontology | microtubule-based transport                                    | GO:0010970 | 9.19996 | 16  | 0.042544 | up   |
| Gene Ontology | polysaccharide metabolic process                               | GO:0005976 | 49.0664 | 64  | 0.042738 | up   |
| Gene Ontology | metal ion transmembrane transporter activity                   | GO:0046873 | 49.0664 | 64  | 0.042738 | up   |
| Gene Ontology | kinase activator activity                                      | GO:0019209 | 9.96662 | 17  | 0.043596 | up   |
| Gene Ontology | lactation                                                      | GO:0007595 | 10.7333 | 18  | 0.043754 | up   |
| Gene Ontology | learning or memory                                             | GO:0007611 | 42.1665 | 56  | 0.043754 | up   |
| Gene Ontology | vitamin biosynthetic process                                   | GO:0009110 | 12.2666 | 20  | 0.043754 | up   |
| Gene Ontology | mesenchymal cell proliferation                                 | GO:0010463 | 10.7333 | 18  | 0.043754 | up   |
| Gene Ontology | regulation of cell morphogenesis involved in differentiation   | GO:0010769 | 38.7165 | 52  | 0.043754 | up   |
| Gene Ontology | ligase activity, forming carbon-nitrogen bonds                 | GO:0016879 | 104.649 | 126 | 0.043754 | up   |
| Gene Ontology | regulation of dephosphorylation                                | GO:0035303 | 12.2666 | 20  | 0.043754 | up   |
| Gene Ontology | regulation of lyase activity                                   | GO:0051339 | 38.7165 | 52  | 0.043754 | up   |
| Gene Ontology | regulation of cell cycle                                       | GO:0051726 | 172.882 | 200 | 0.043754 | up   |
| Gene Ontology | actin filament bundle                                          | GO:0032432 | 11.4999 | 19  | 0.043879 | up   |
| Gene Ontology | regulation of heart contraction                                | GO:0008016 | 31.0498 | 43  | 0.044011 | up   |
| Gene Ontology | proteasome complex                                             | GO:0000502 | 24.1499 | 14  | 0.044458 | down |
| Gene Ontology | single fertilization                                           | GO:0007338 | 24.1499 | 14  | 0.044458 | down |
| Gene Ontology | regulation of synaptic transmission                            | GO:0050804 | 48.2998 | 63  | 0.044712 | up   |
| Gene Ontology | digestive tract development                                    | GO:0048565 | 21.0832 | 31  | 0.045133 | up   |
| Gene Ontology | telencephalon development                                      | GO:0021537 | 34.4998 | 47  | 0.045422 | up   |
| Gene Ontology | induction of apoptosis by extracellular signals                | GO:0008624 | 41.3998 | 55  | 0.046112 | up   |
| Gene Ontology | acid-amino acid ligase activity                                | GO:0016881 | 93.9162 | 114 | 0.046188 | up   |
| Gene Ontology | clathrin coated vesicle membrane                               | GO:0030665 | 30.2832 | 42  | 0.046312 | up   |

|               |                                                                                                                                                         |            |         |     |          |      |
|---------------|---------------------------------------------------------------------------------------------------------------------------------------------------------|------------|---------|-----|----------|------|
| Gene Ontology | ubiquitin-protein ligase activity                                                                                                                       | GO:0004842 | 73.2163 | 91  | 0.047072 | up   |
| Gene Ontology | regulation of ubiquitin-protein<br>ligase activity                                                                                                      | GO:0051438 | 31.4332 | 20  | 0.048047 | down |
| Gene Ontology | cell activation                                                                                                                                         | GO:0001775 | 149.116 | 174 | 0.048092 | up   |
| Gene Ontology | lipid oxidation                                                                                                                                         | GO:0034440 | 25.2999 | 36  | 0.048139 | up   |
| Gene Ontology | negative regulation of transferase<br>activity                                                                                                          | GO:0051348 | 44.0831 | 58  | 0.048139 | up   |
| Gene Ontology | ovulation from ovarian follicle                                                                                                                         | GO:0001542 | 4.98331 | 10  | 0.04827  | up   |
| Gene Ontology | aging                                                                                                                                                   | GO:0007568 | 50.2164 | 65  | 0.04827  | up   |
| Gene Ontology | endosome membrane                                                                                                                                       | GO:0010008 | 80.4996 | 99  | 0.04827  | up   |
| Gene Ontology | sodium ion transmembrane<br>transporter activity                                                                                                        | GO:0015081 | 29.5165 | 41  | 0.04827  | up   |
| Gene Ontology | GMP binding                                                                                                                                             | GO:0019002 | 4.98331 | 10  | 0.04827  | up   |
| Gene Ontology | tumor necrosis factor-mediated<br>signaling pathway                                                                                                     | GO:0033209 | 4.98331 | 10  | 0.04827  | up   |
| Gene Ontology | regulation of CD4-positive, alpha<br>beta T cell differentiation                                                                                        | GO:0043370 | 4.98331 | 10  | 0.04827  | up   |
| Gene Ontology | endosomal part                                                                                                                                          | GO:0044440 | 80.4996 | 99  | 0.04827  | up   |
| Gene Ontology | regulation of adenylate cyclase<br>activity                                                                                                             | GO:0045761 | 37.1832 | 50  | 0.04827  | up   |
| Gene Ontology | negative regulation of heart<br>contraction                                                                                                             | GO:0045822 | 4.98331 | 10  | 0.04827  | up   |
| Gene Ontology | microtubule polymerization                                                                                                                              | GO:0046785 | 4.98331 | 10  | 0.04827  | up   |
| Gene Ontology | mitochondrial proton-transporting<br>ATP synthase complex                                                                                               | GO:0005753 | 7.66663 | 2   | 0.048343 | down |
| Gene Ontology | cellular macromolecule catabolic<br>process                                                                                                             | GO:0044265 | 183.616 | 211 | 0.048343 | up   |
| Gene Ontology | endoplasmic reticulum membrane<br>endonuclease activity, active with<br>either ribo- or deoxyribonucleic<br>acids and producing<br>3'-phosphomonoesters | GO:0005789 | 238.049 | 269 | 0.048405 | up   |
| Gene Ontology | regulation of ligase activity                                                                                                                           | GO:0016894 | 9.19996 | 3   | 0.048785 | down |
| Gene Ontology | nucleobase, nucleoside and<br>nucleotide biosynthetic process                                                                                           | GO:0051340 | 32.5832 | 21  | 0.048785 | down |
| Gene Ontology | nucleobase, nucleoside,<br>nucleotide and nucleic acid<br>biosynthetic process                                                                          | GO:0034404 | 114.233 | 136 | 0.049343 | up   |
| Gene Ontology | nucleotide and nucleic acid<br>biosynthetic process                                                                                                     | GO:0034654 | 114.233 | 136 | 0.049343 | up   |
| Gene Ontology | nuclear membrane-endoplasmic<br>reticulum network                                                                                                       | GO:0042175 | 243.799 | 275 | 0.049343 | up   |
| Gene Ontology | peptidyl-serine modification                                                                                                                            | GO:0018209 | 24.5332 | 35  | 0.0497   | up   |
| Gene Ontology | site of polarized growth                                                                                                                                | GO:0030427 | 24.5332 | 35  | 0.0497   | up   |
| Gene Ontology | respiratory system development                                                                                                                          | GO:0060541 | 43.3165 | 57  | 0.049984 | up   |



\* The list of enriched pathways ( $P < 0.05$ , sort by FDR) in the genes predicted to be targeted by the selected 8 microRNA. In addition to associations with more general functional KEGG or GO terms, an overrepresentation of gene targets associated with cancer was seen for the selected miRNAs. Pathways which are well known to be linked with tumor-promoting function were marked in bold.

## Figures

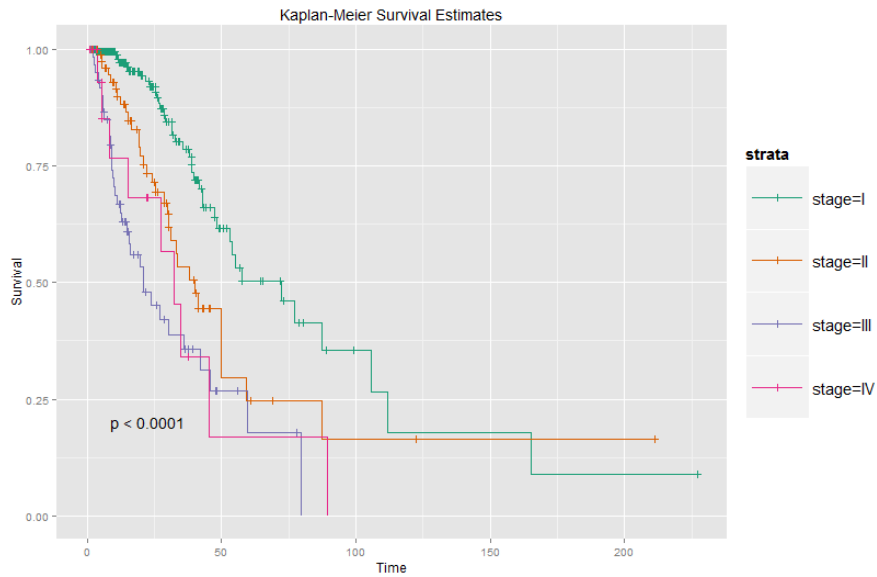

**Figure S1. The prognostic role of disease stage in LUAD.** Kaplan-Meier analysis of overall survival based on disease stage,  $n=371$ , 1 observations deleted due to missing values. The median OSs for stage I to IV were 72.5 months, 40.3 months, 20.9 months and 32.5 months, respectively. Patients in early stage possessed with significantly good overall survival compared with that of patients in high stage,  $P < 0.001$ .

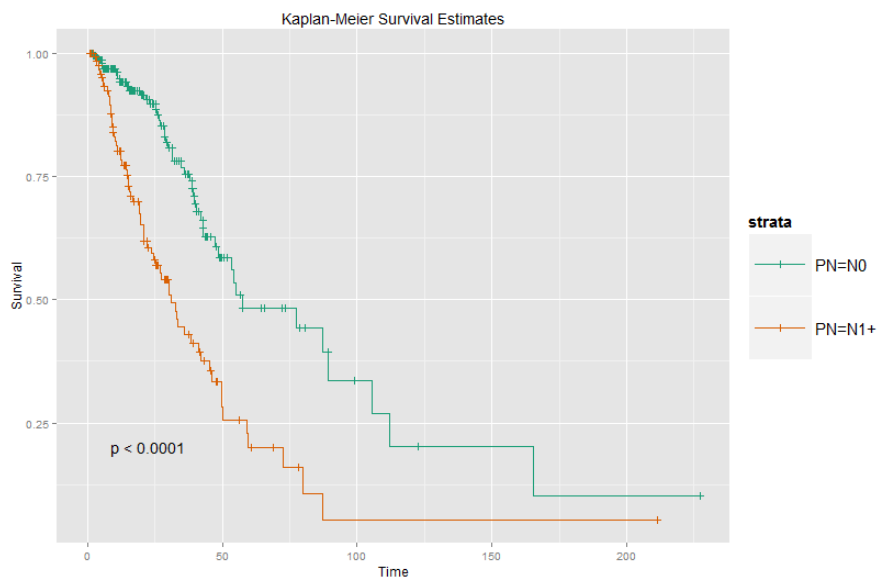

**Figure S2. The prognostic role of N stage in LUAD.** Kaplan-Meier analysis of overall survival based on M stage,  $n=362$ , 10 observations deleted due to missing values. Patients in N0 stage ( $n=231$ ) possessed with significantly good overall survival compared with that of patients in N1+ stage ( $n=131$ ) (median OS: 57.5 months vs. 31.0 months),  $P < 0.001$ .

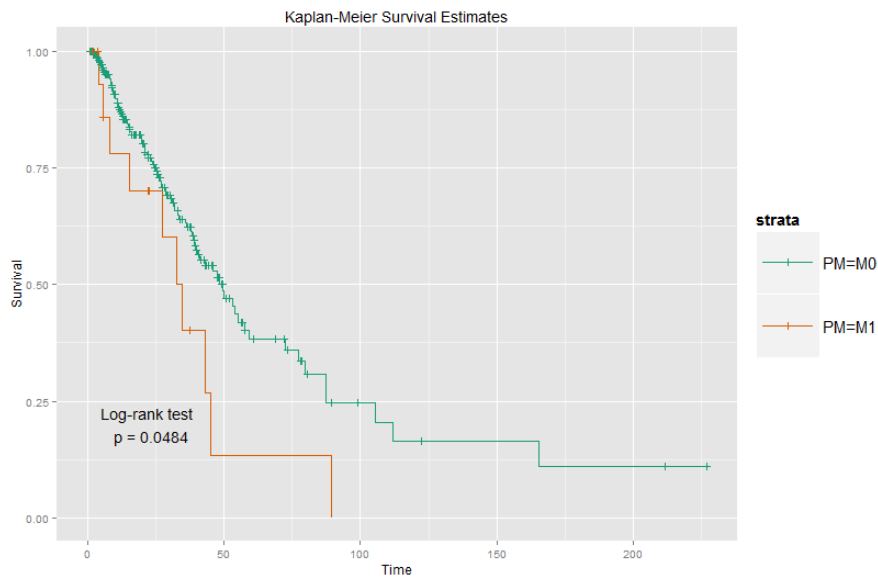

**Figure S3. The prognostic role of M stage in LUAD.** Kaplan-Meier analysis of overall survival based on M stage, n=282, 90 observations deleted due to missing values. Patients in M0 stage (n=266) possessed with significantly good overall survival compared with that of patients in M1 stage (n=16) (median OS: 49.7 months vs. 34.7 months),  $P = 0.048$ .

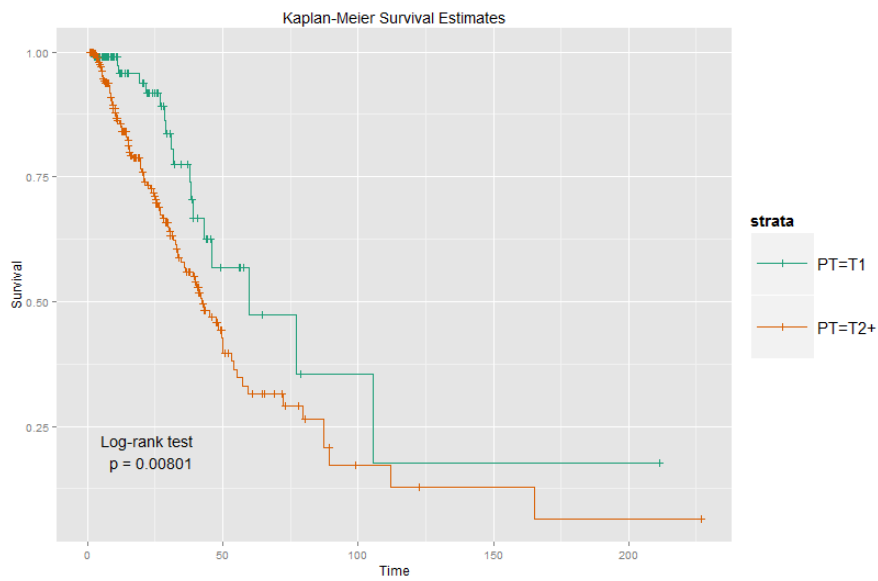

**Figure S4. The prognostic role of T stage in LUAD.** Kaplan-Meier analysis of overall survival based on M stage, n=370, 2 observations deleted due to missing values. Patients in T1 stage (n=112) possessed with significantly good overall survival compared with that of patients in T2+ stage (n=258) (median OS: 59.7 months vs. 42.2 months),  $P = 0.008$ .

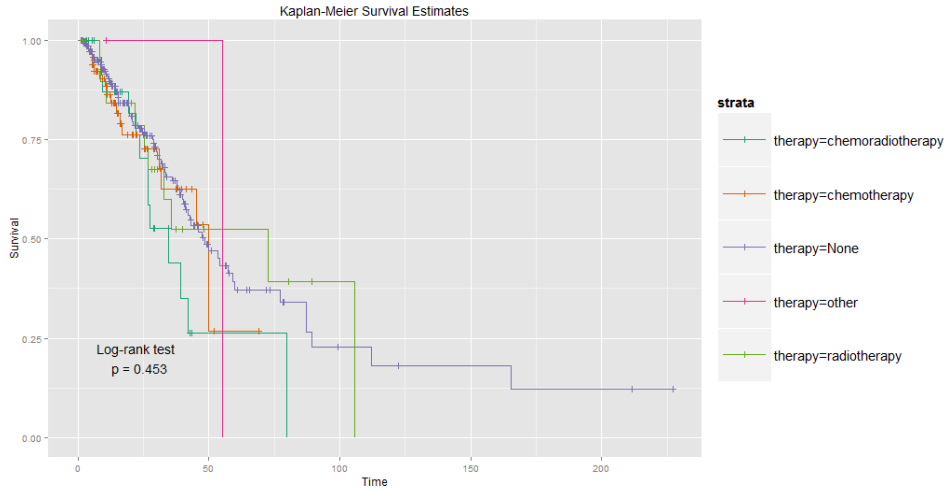

**Figure S5. The prognostic role of therapy in LUAD.** Kaplan-Meier analysis of OS based on therapy, no significant association was found. The median OSs for different therapy (chemotherapy, radiotherapy, chemo-radiotherapy, other and none) were 49.7 months, 72.5 months, 34.7 months, 55.1 months and 48.4 months, respectively,  $P = 0.453$ .

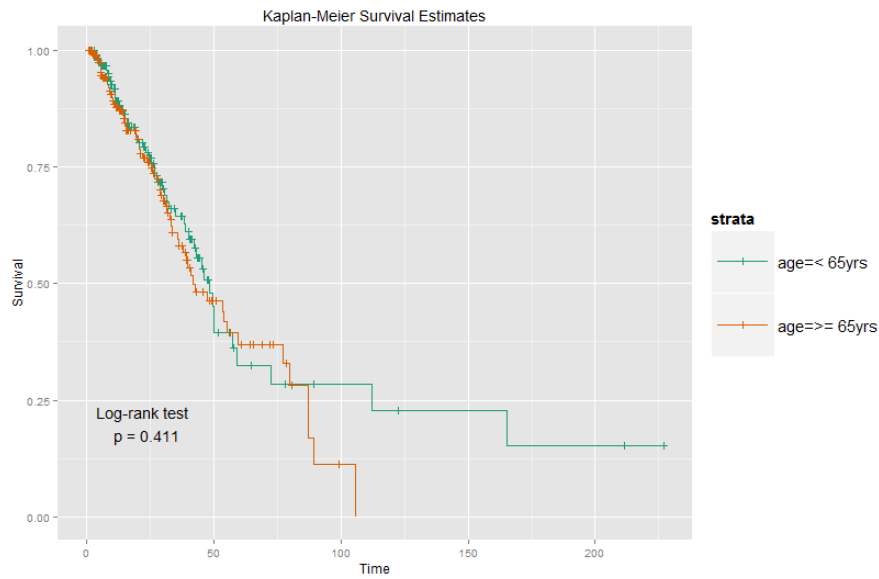

**Figure S6. The prognostic role of age in LUAD.** Kaplan-Meier analysis of overall survival based on age,  $n=372$ . Patients were divided into 2 groups using 65yrs for the cutoff point of age at initial pathologic diagnosis. No significant association was found between age and OS in TCGA LUAD cohort. Median OSs for young group and old group were 48.4 months and 41.9 months, respectively,  $P = 0.411$ .

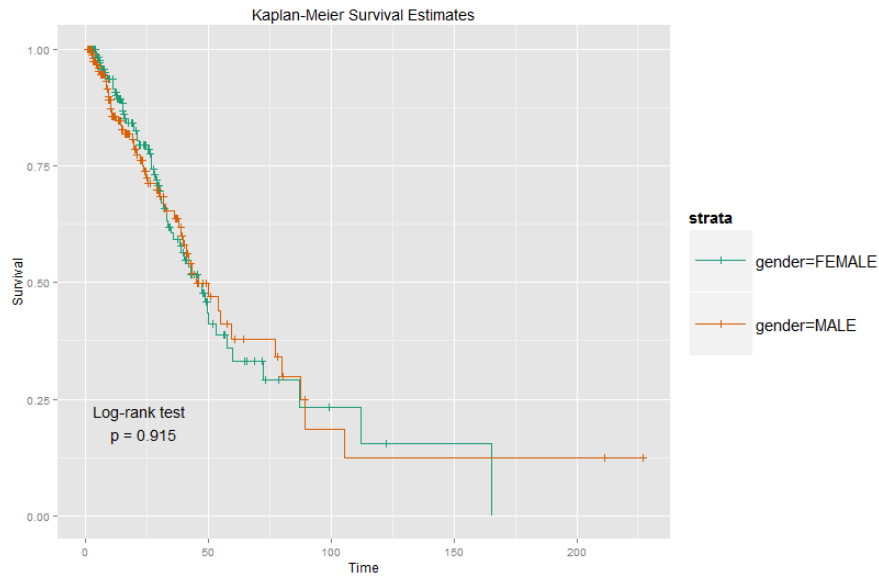

**Figure S7. The prognostic role of gender in LUAD.** Kaplan-Meier analysis of OS based on gender, no significant association was found. Median OSs for male and female were 45.2 months and 46.0 months, respectively,  $P = 0.915$ .

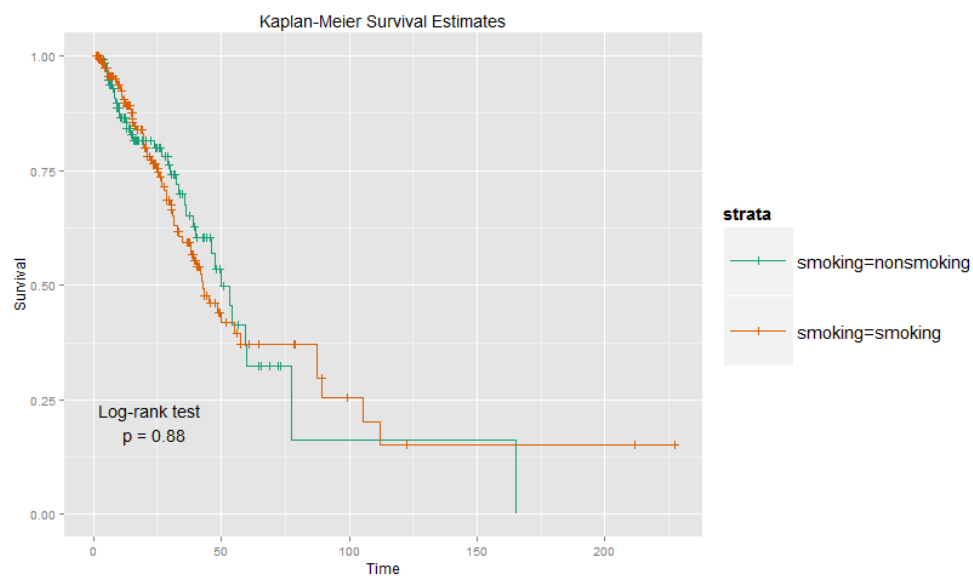

**Figure S8. The prognostic role of smoking status in LUAD.** Kaplan-Meier analysis of overall survival based on smoking status, no significant association was found. Median OSs for non-smoking patients and smoking patients were 49.7 months and 42.9 months, respectively,  $P = 0.880$ .

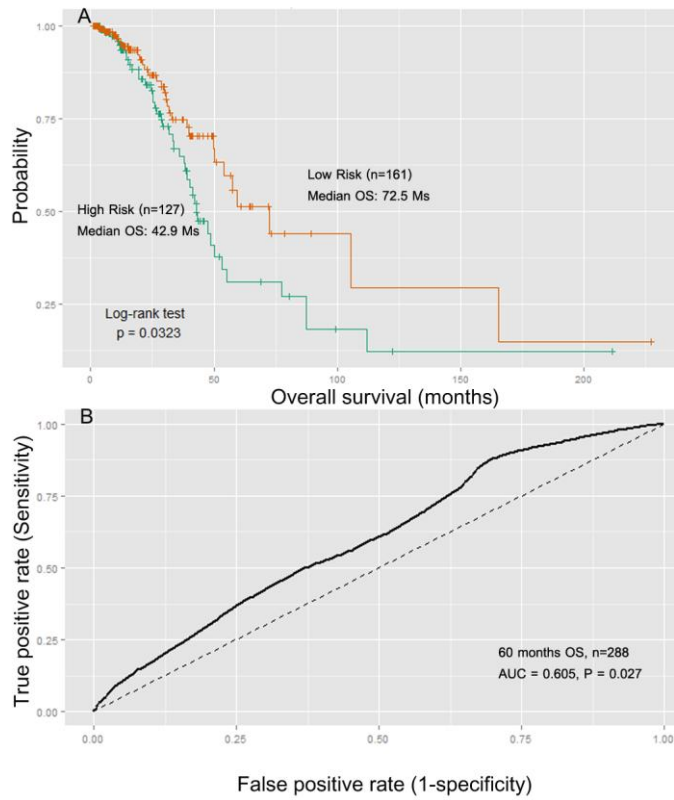

**Figure S9. Kaplan–Meier and ROC curves for the 8-miRNA signature for patients of stage I and II.** (A) The Kaplan–Meier curves for LUAD risk groups for patients of stage I and II ( $n = 288$ ) divided by the median cutoff point. (B) The ROC curve had an AUC of 0.605 ( $P = 0.027$ ). The permutation  $P$  value was obtained from 1,000 permutations for testing the null hypothesis (AUC = 0.5)
